# Supplementary material for: Synthesis, In Vitro α-Glucosidase Inhibitory Activity and Molecular Docking Studies of Novel Benzothiazole-Triazole Derivatives
Source: MDPI journal article supplement (doi:10.3390/molecules22091555), 2017-09-15
Supplement: s1 [file s1]

## **Supplemental Material**

**Synthesis, *in vitro*  $\alpha$ -glucosidase inhibitory activity and molecular docking studies of novel benzothiazole-triazole derivatives**

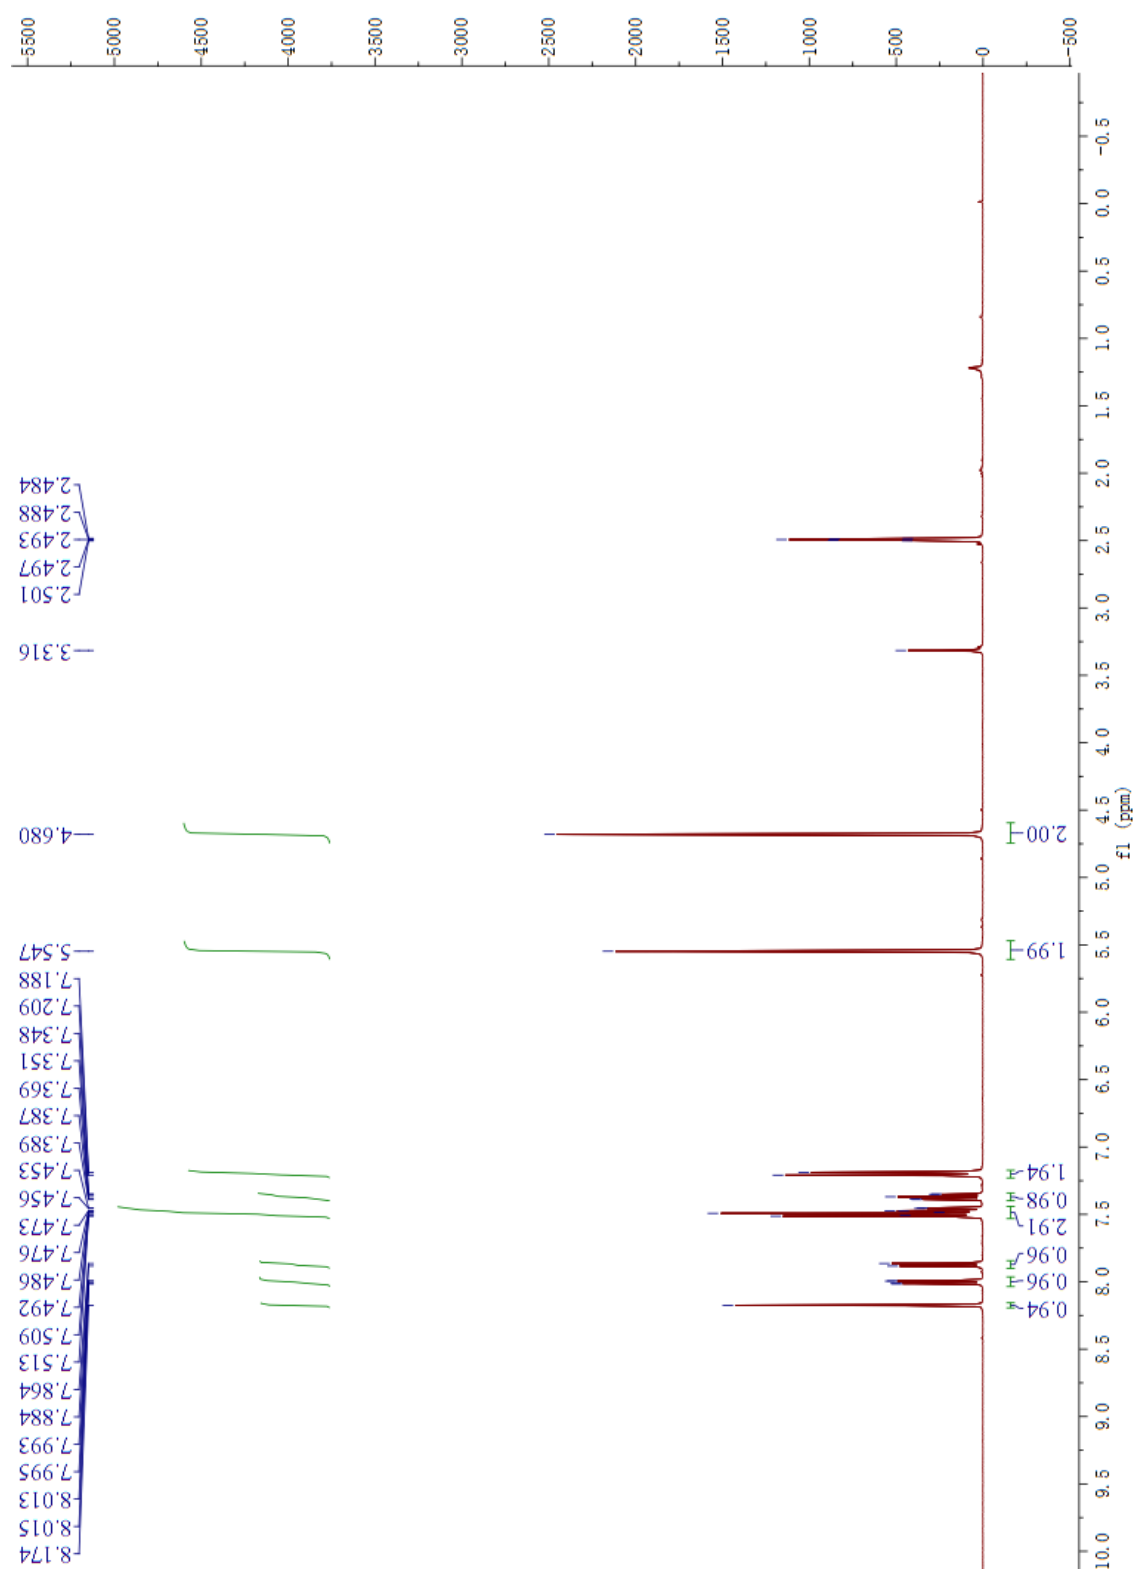

**Figure S 1:** <sup>1</sup>H NMR of compound 6a

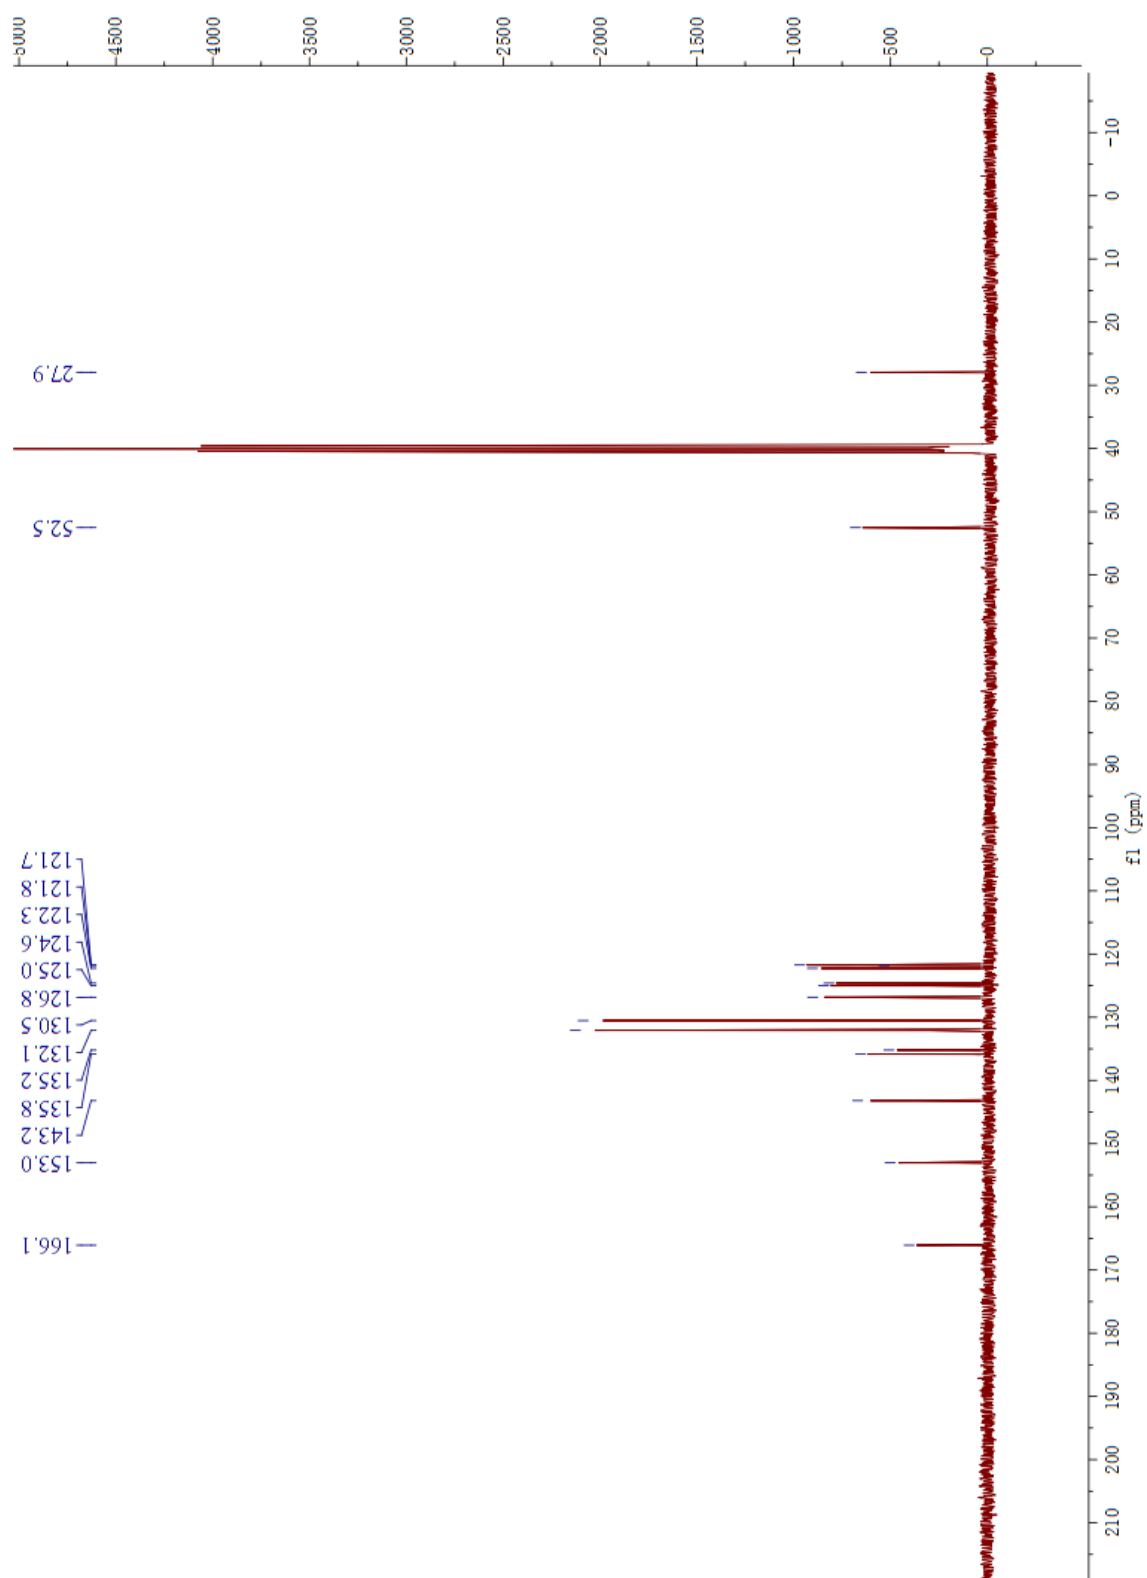

Figure S 2:  $^{13}\text{C}$  NMR of compound 6a

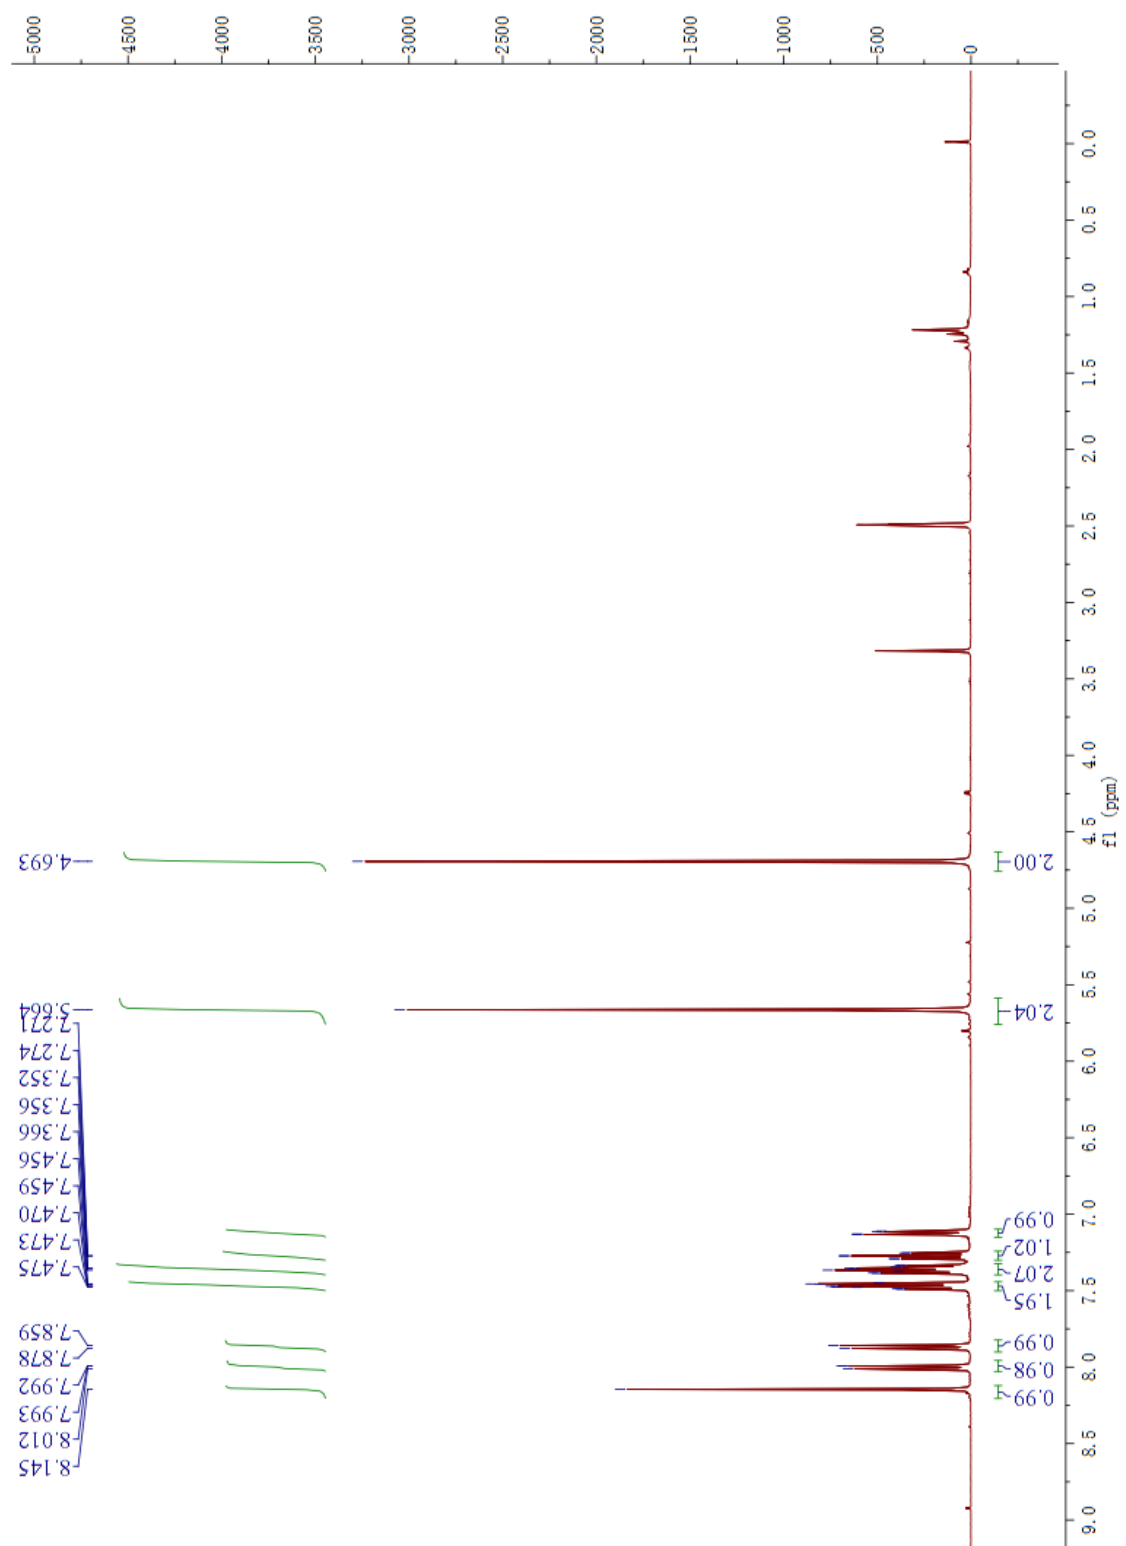

**Figure S 3:** <sup>1</sup>H NMR of compound 6b

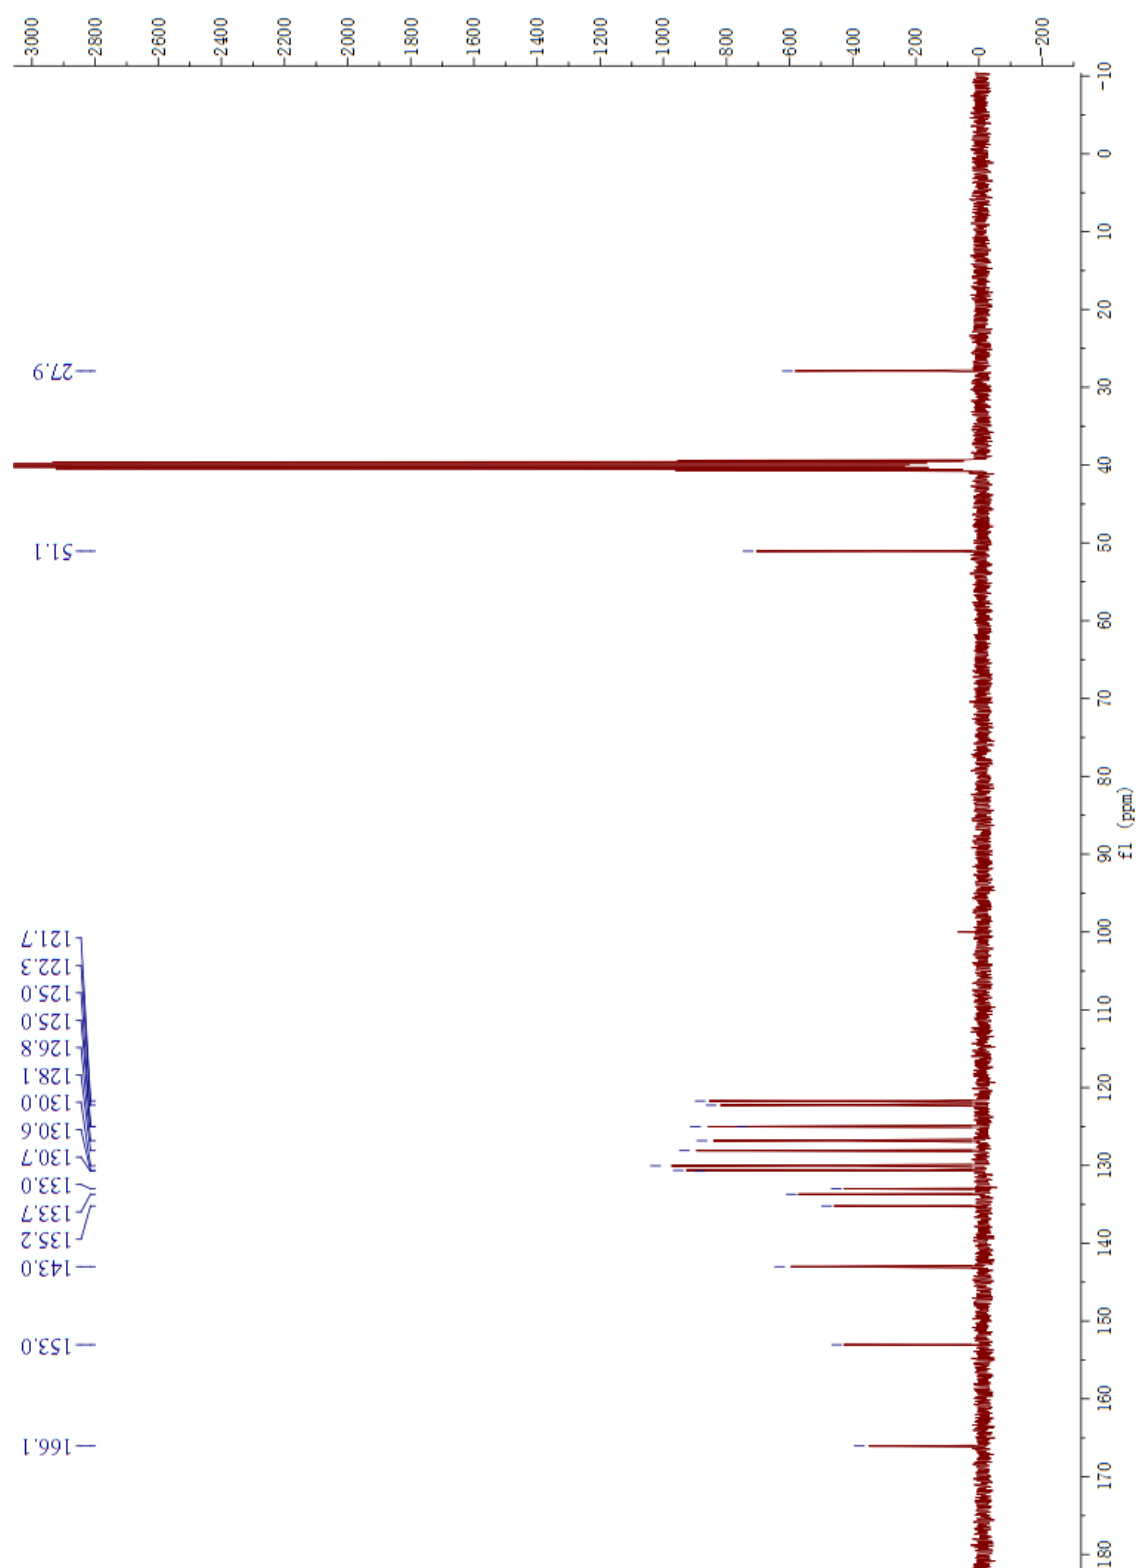

**Figure S 4:** <sup>13</sup>C NMR of compound 6b

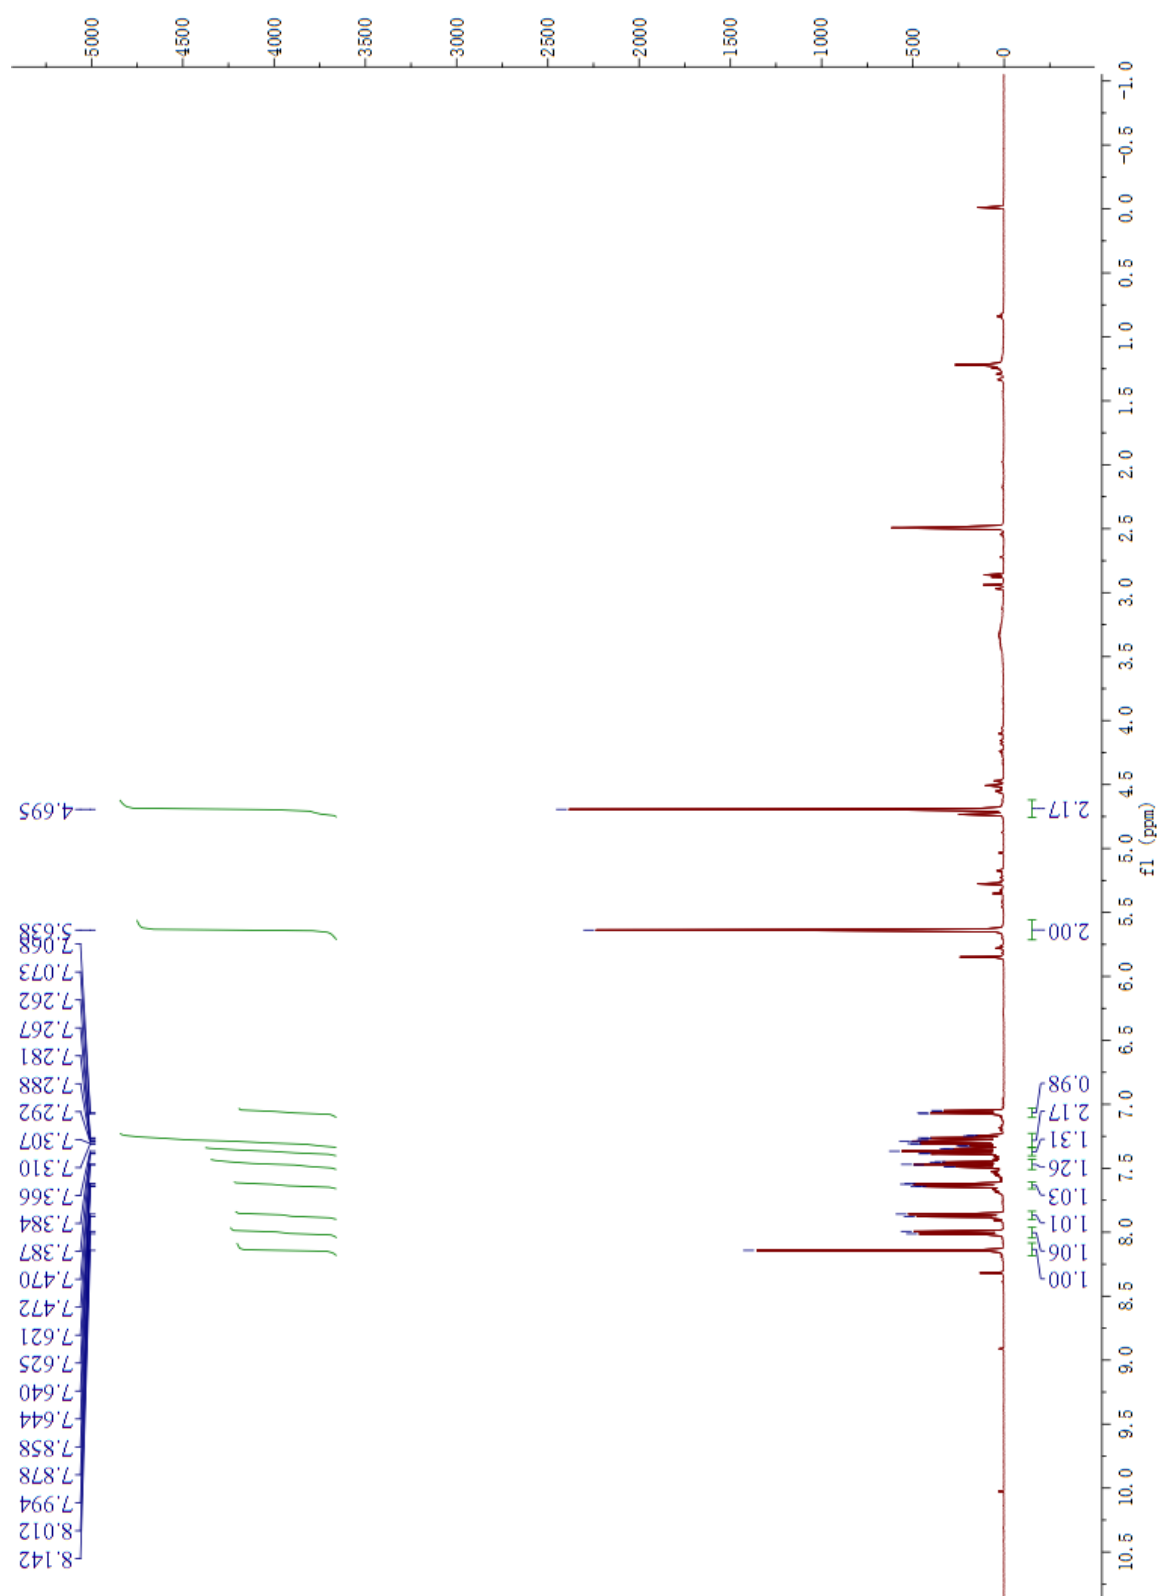

Figure S 5:  $^1\text{H}$  NMR of compound 6c

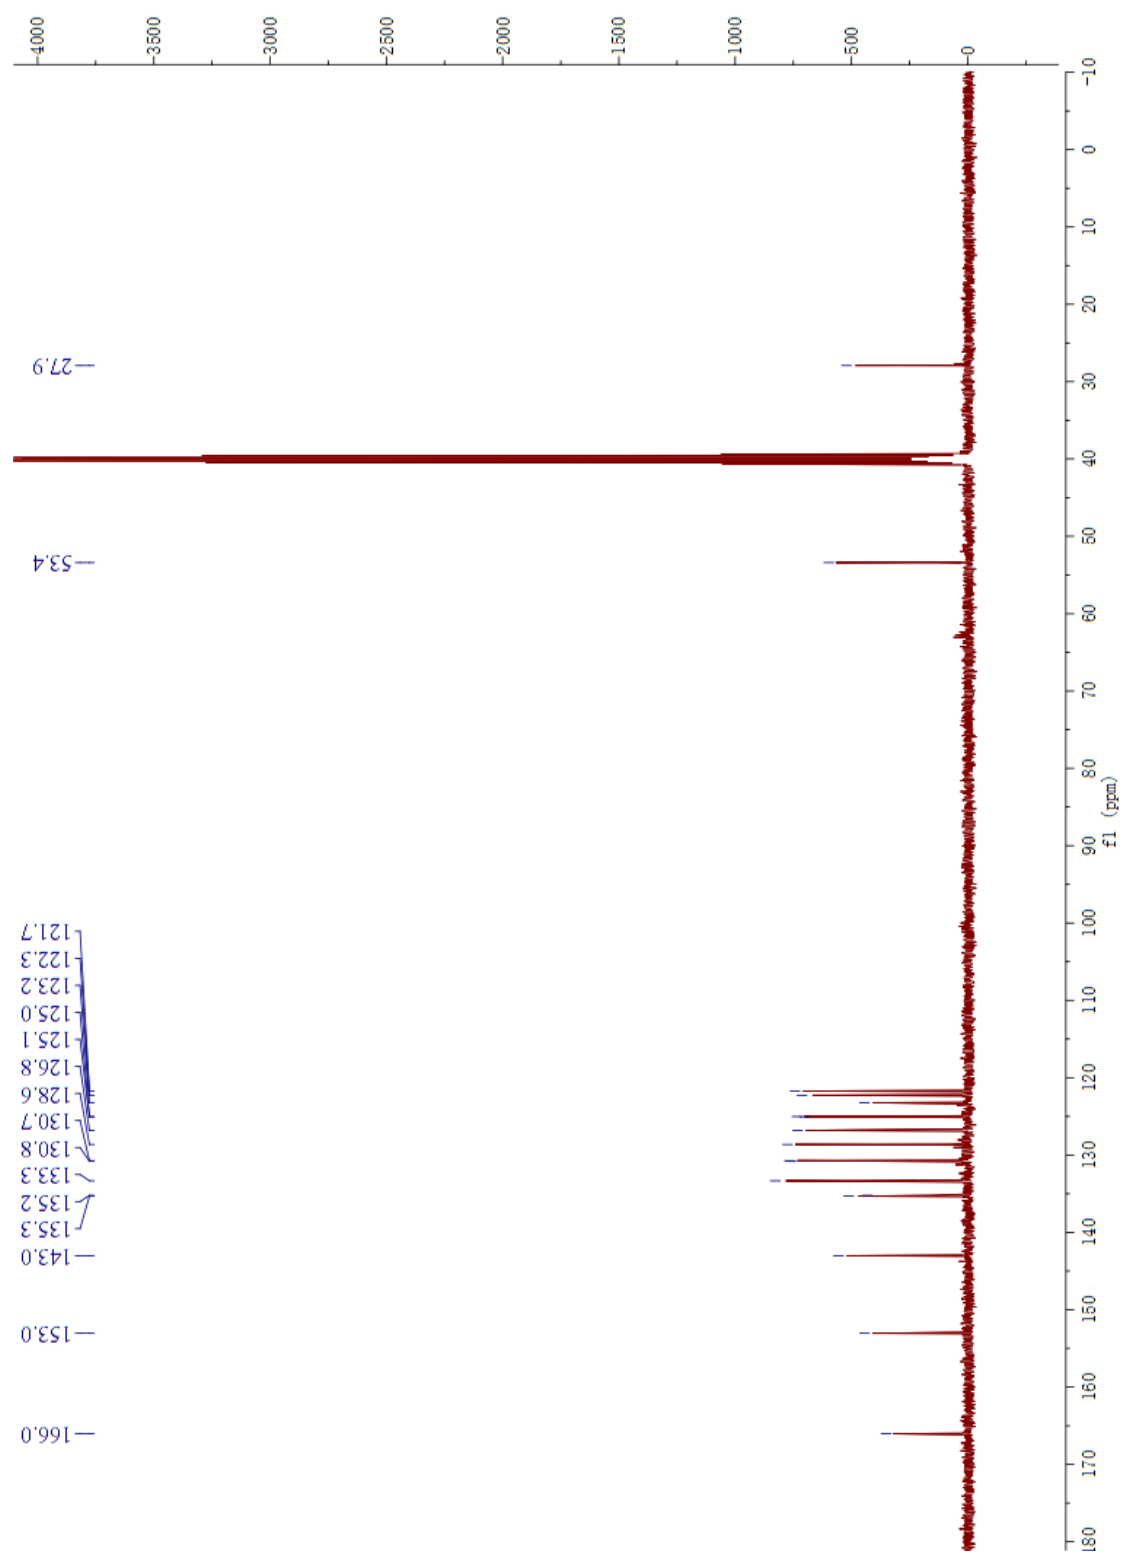

**Figure S 6:**  $^{13}\text{C}$  NMR of compound 6c

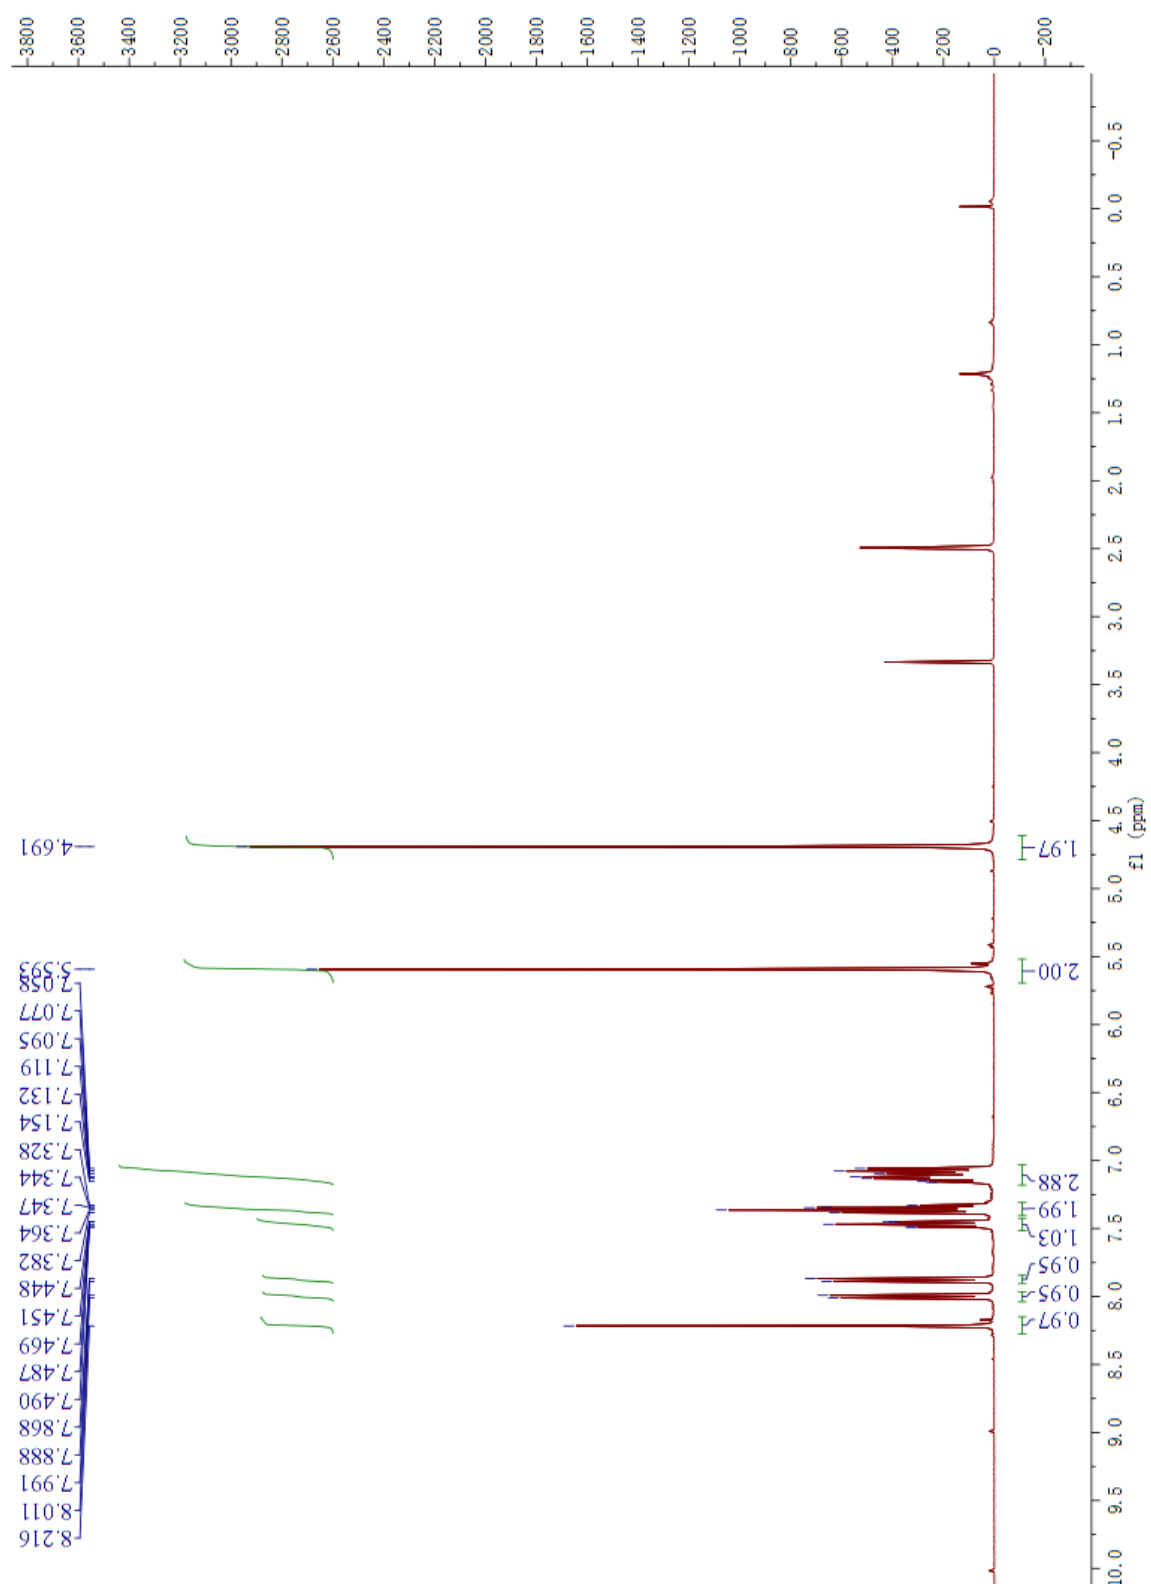

Figure S 7:  $^1\text{H}$  NMR of compound 6d



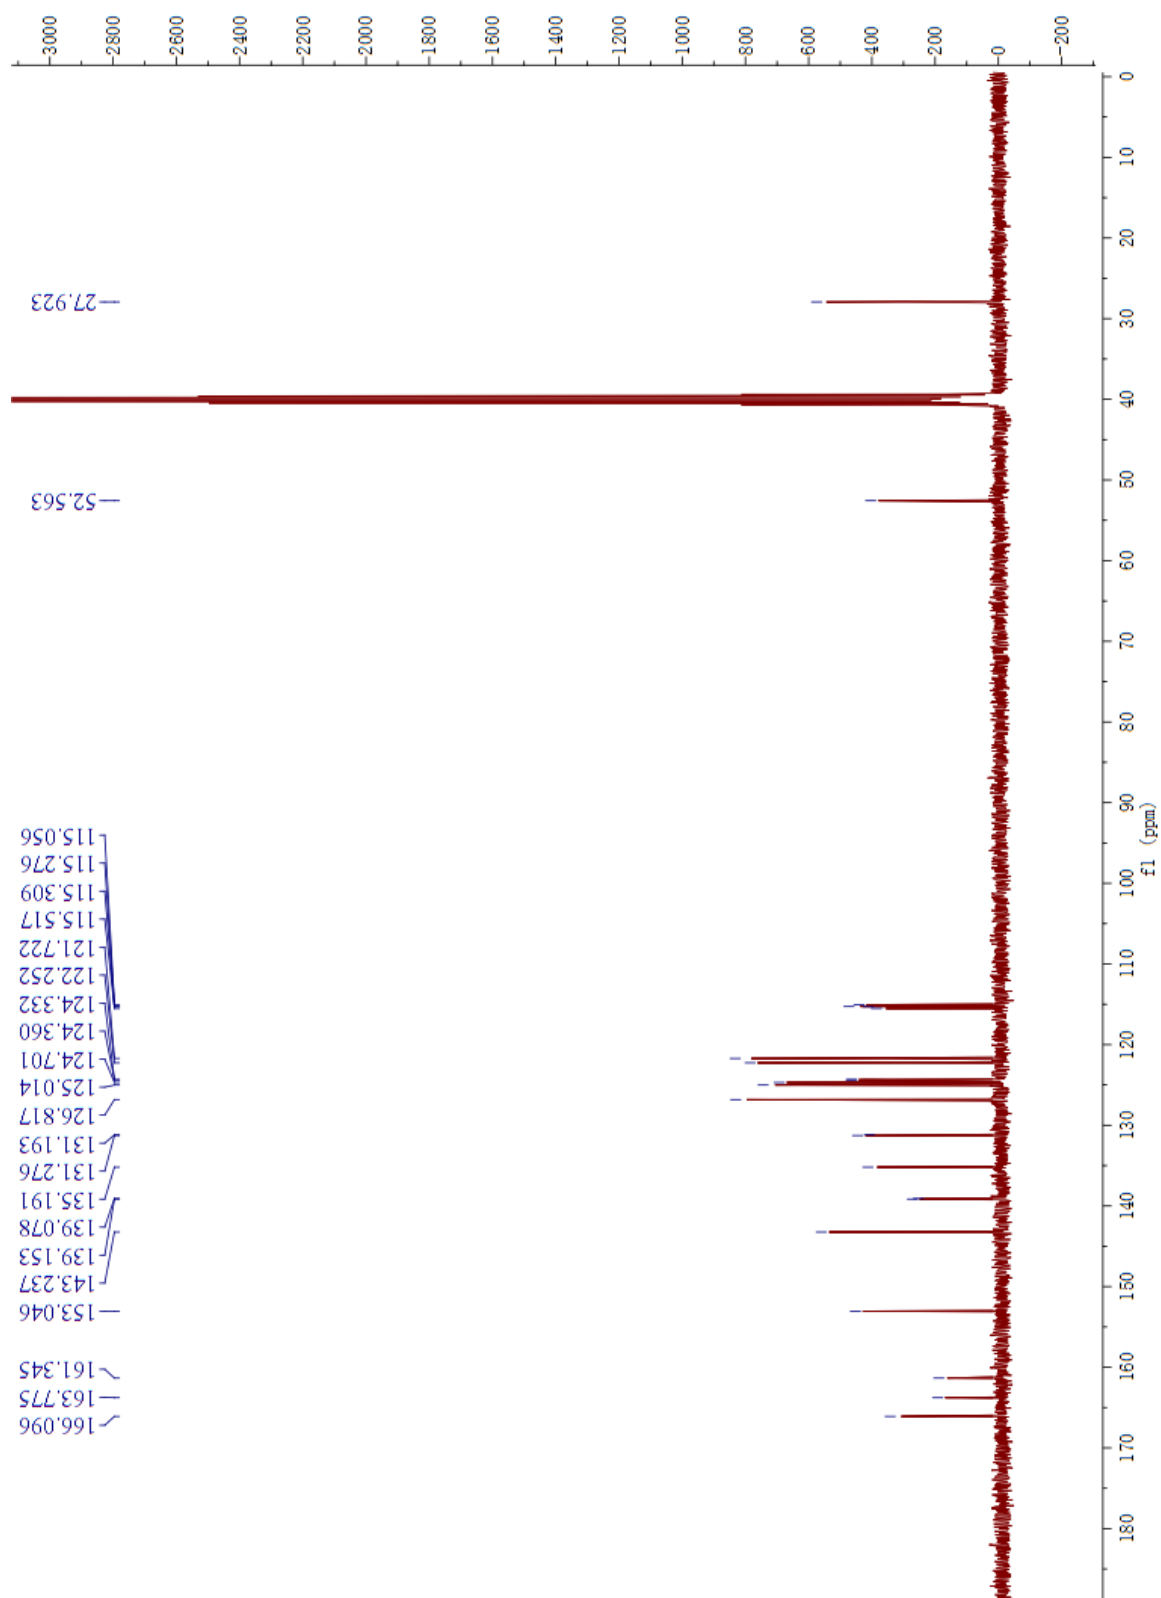

**Figure S 8:**  $^{13}\text{C}$  NMR of compound 6d

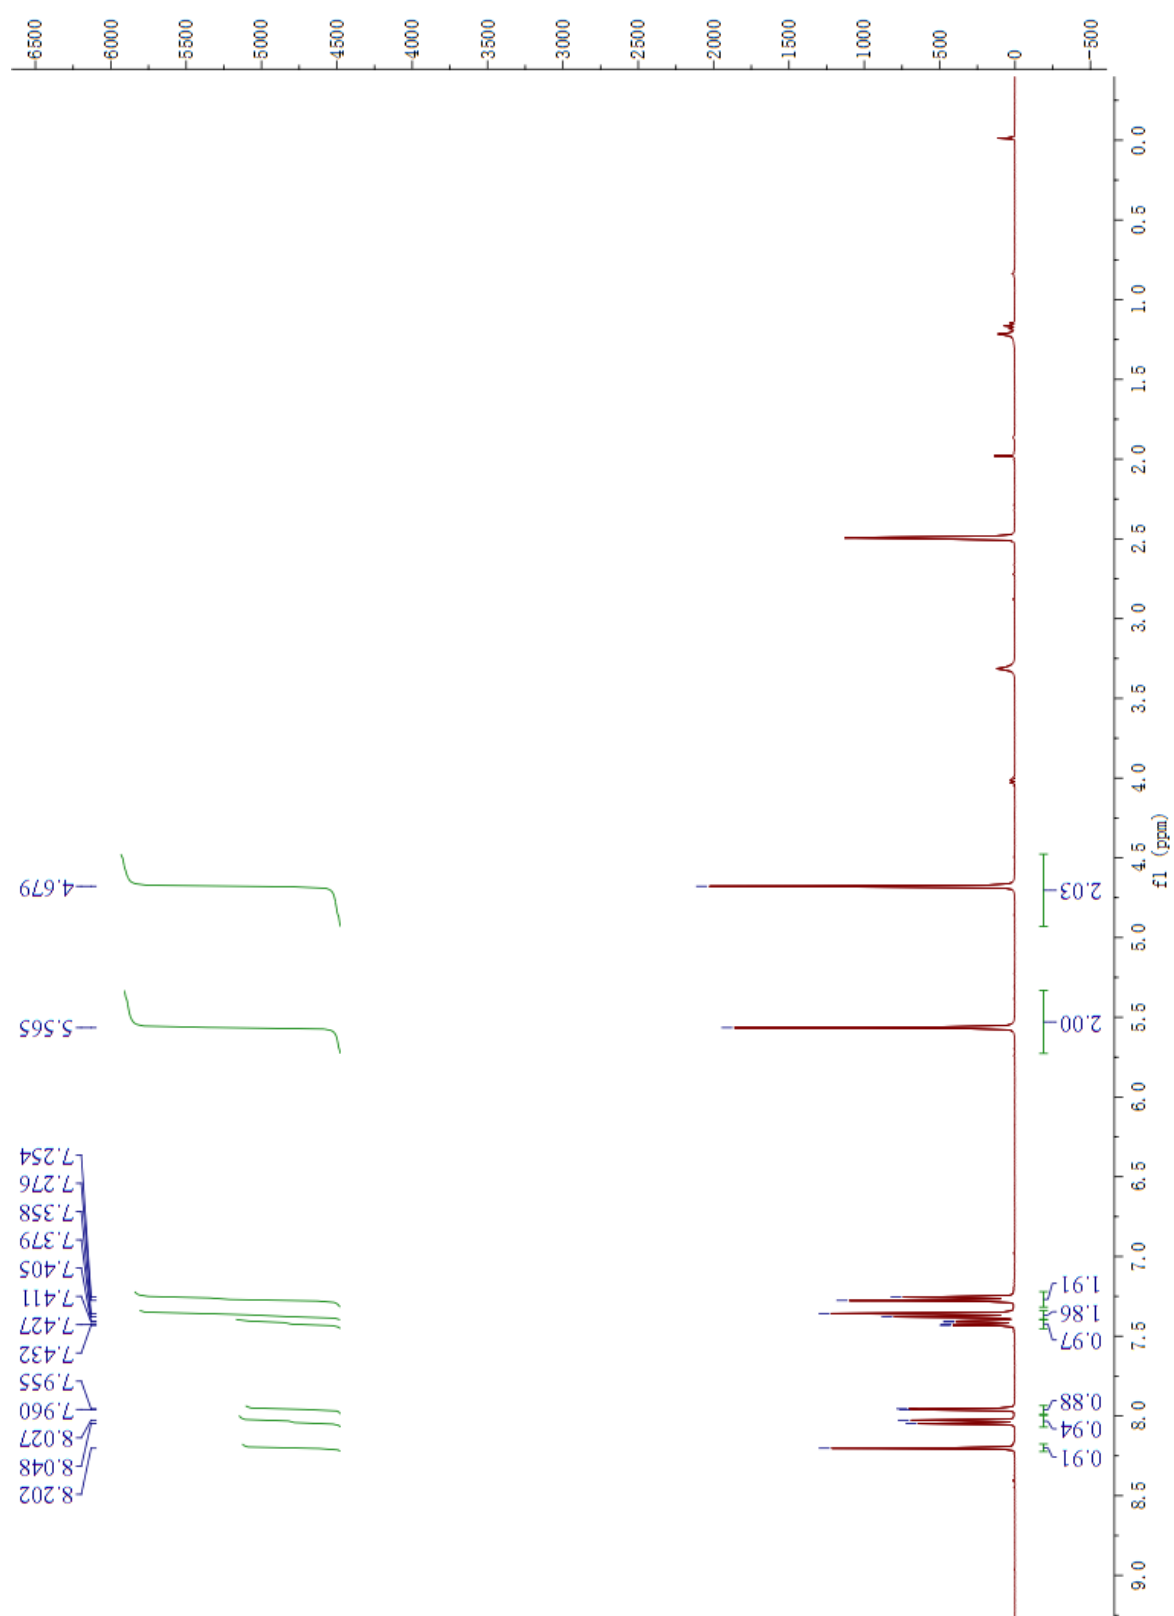

Figure S 9:  $^1\text{H}$  NMR of compound 6e

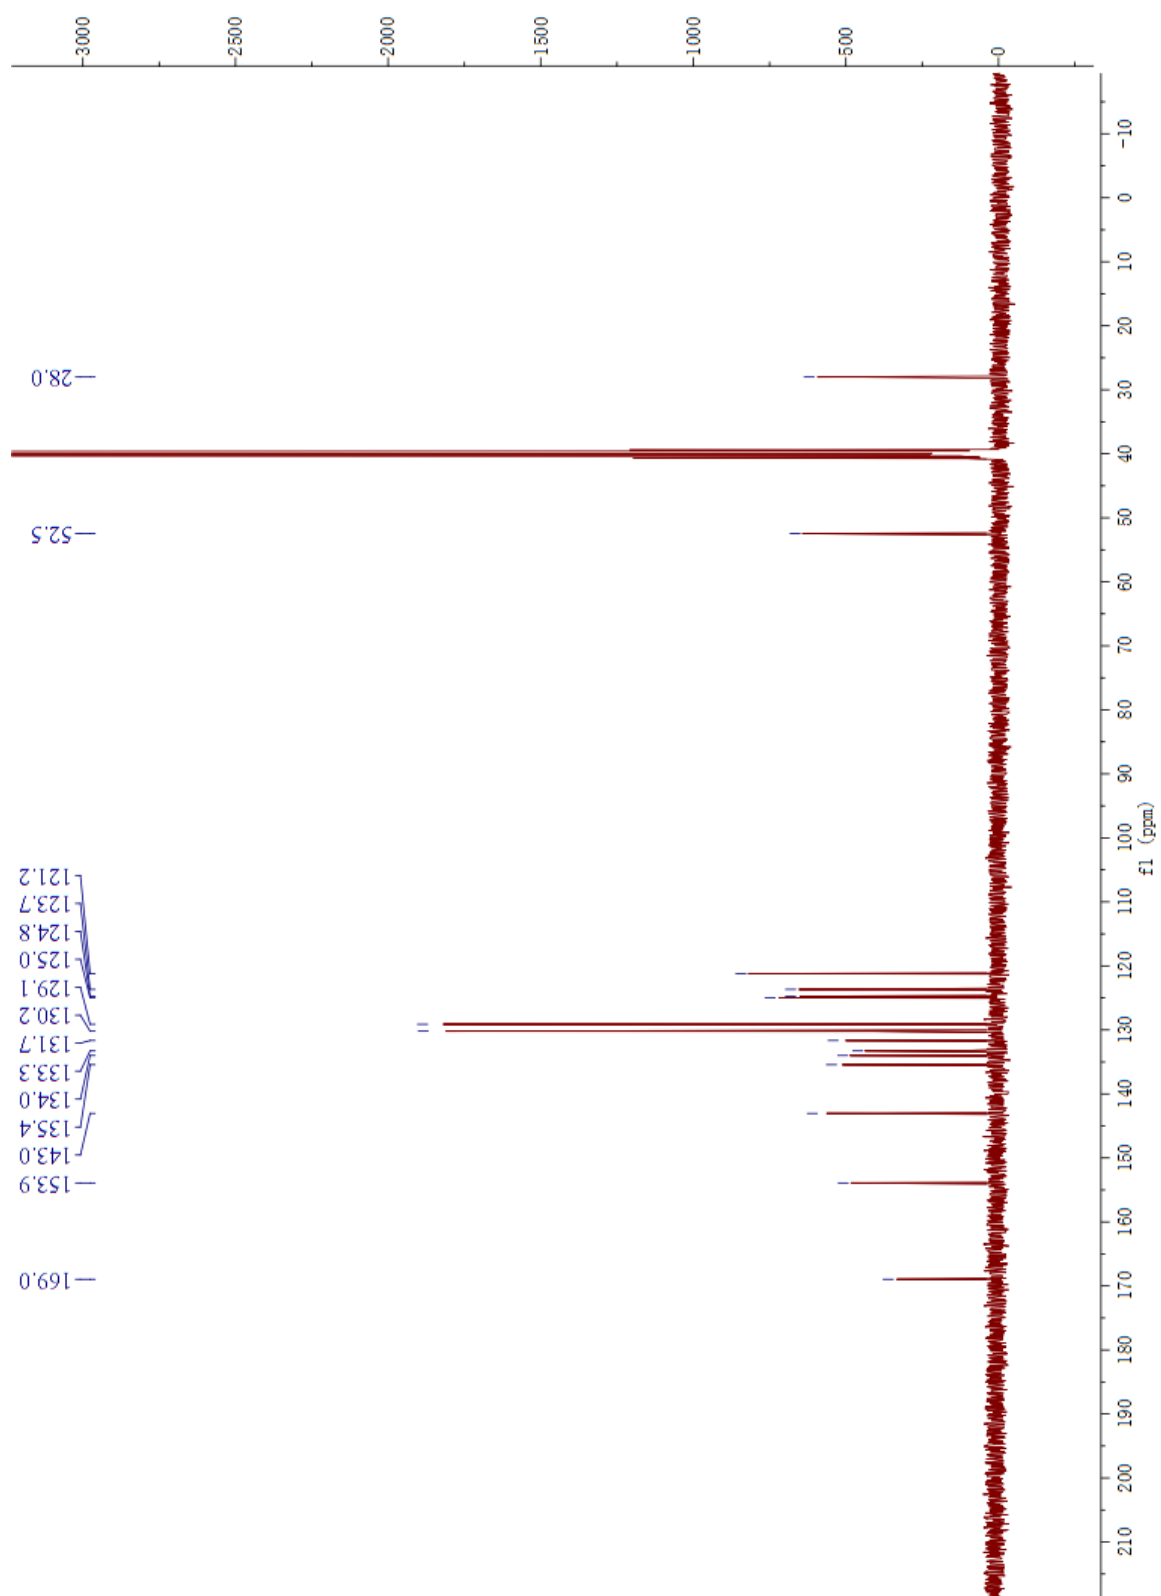

Figure S 10:  $^{13}\text{C}$  NMR of compound 6e

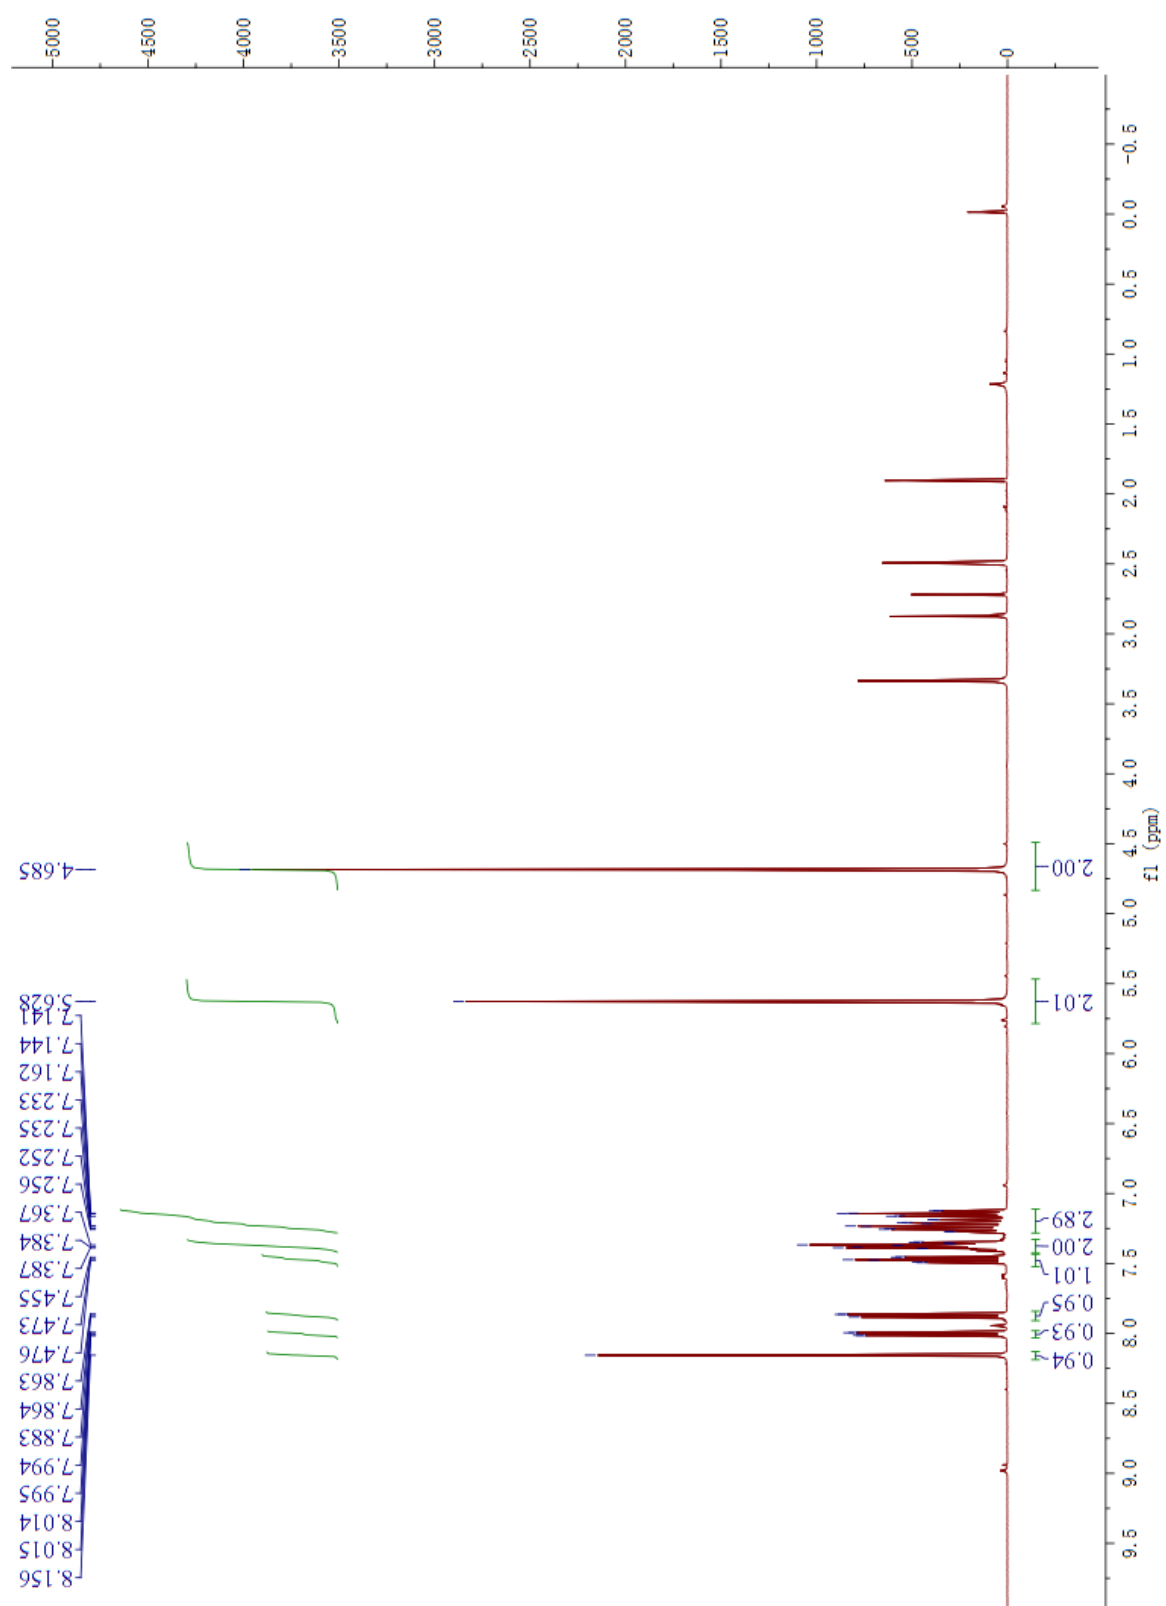

Figure S 11:  $^1\text{H}$  NMR of compound 6f

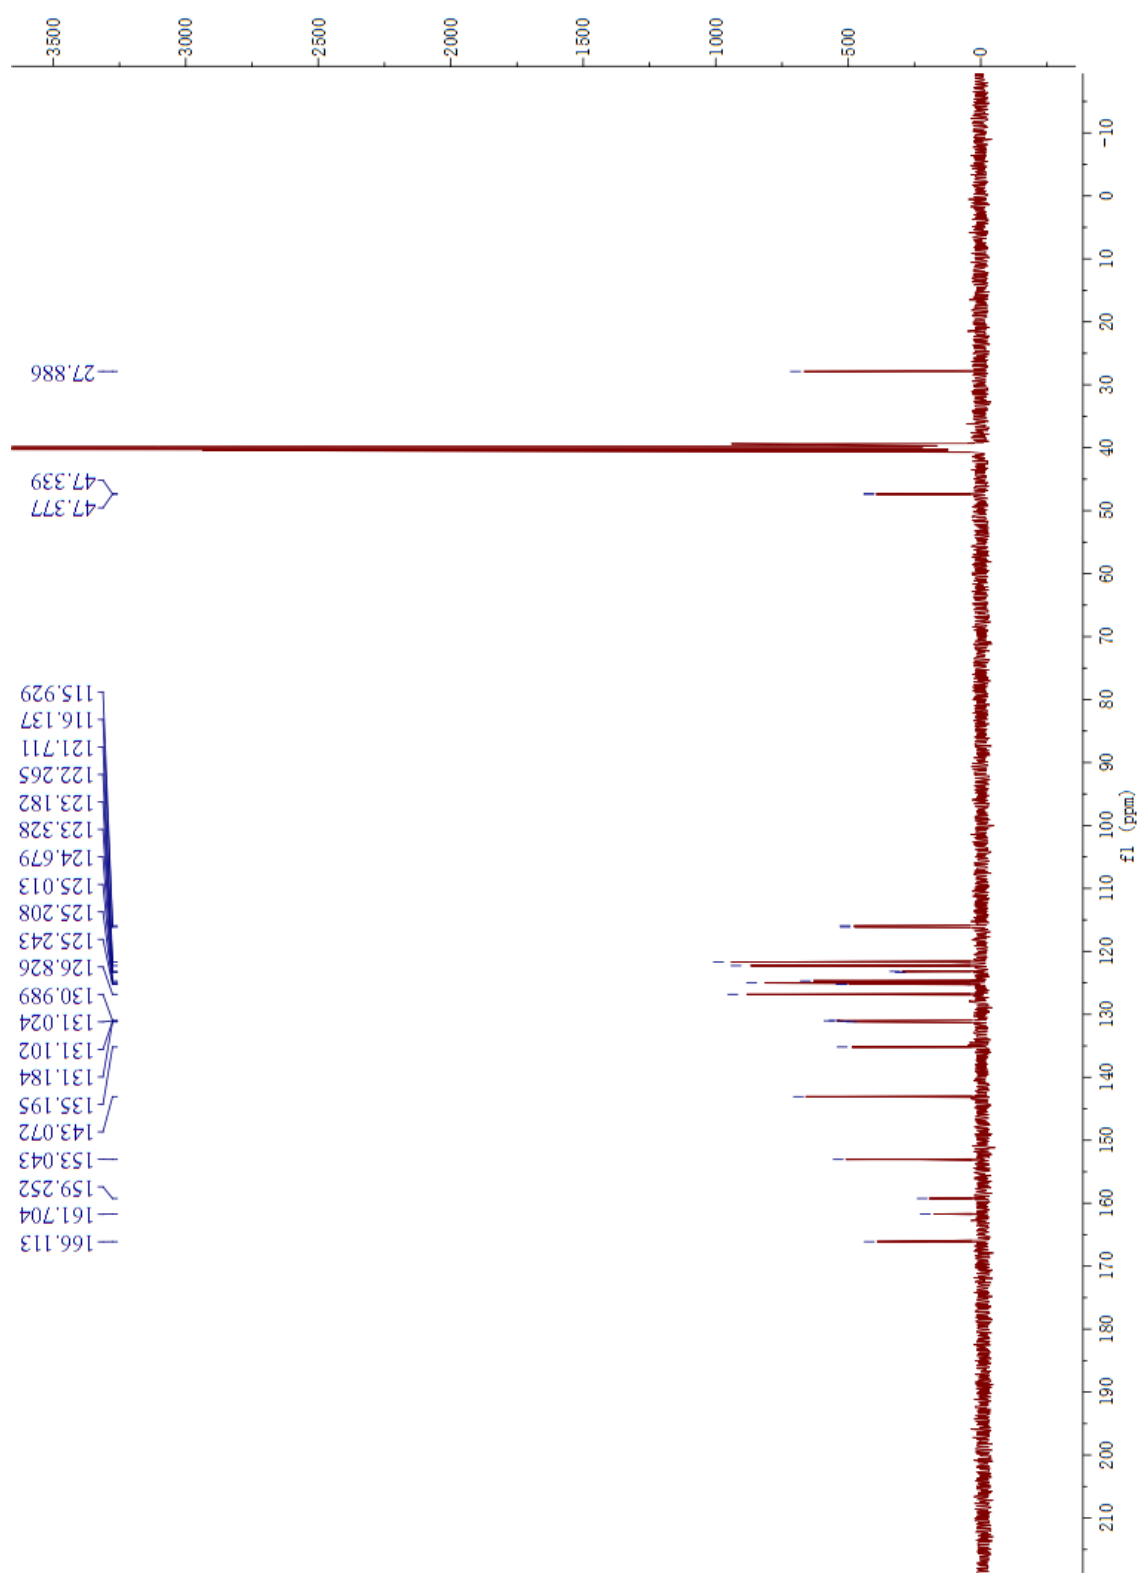

Figure S 12: <sup>13</sup>C NMR of compound 6f

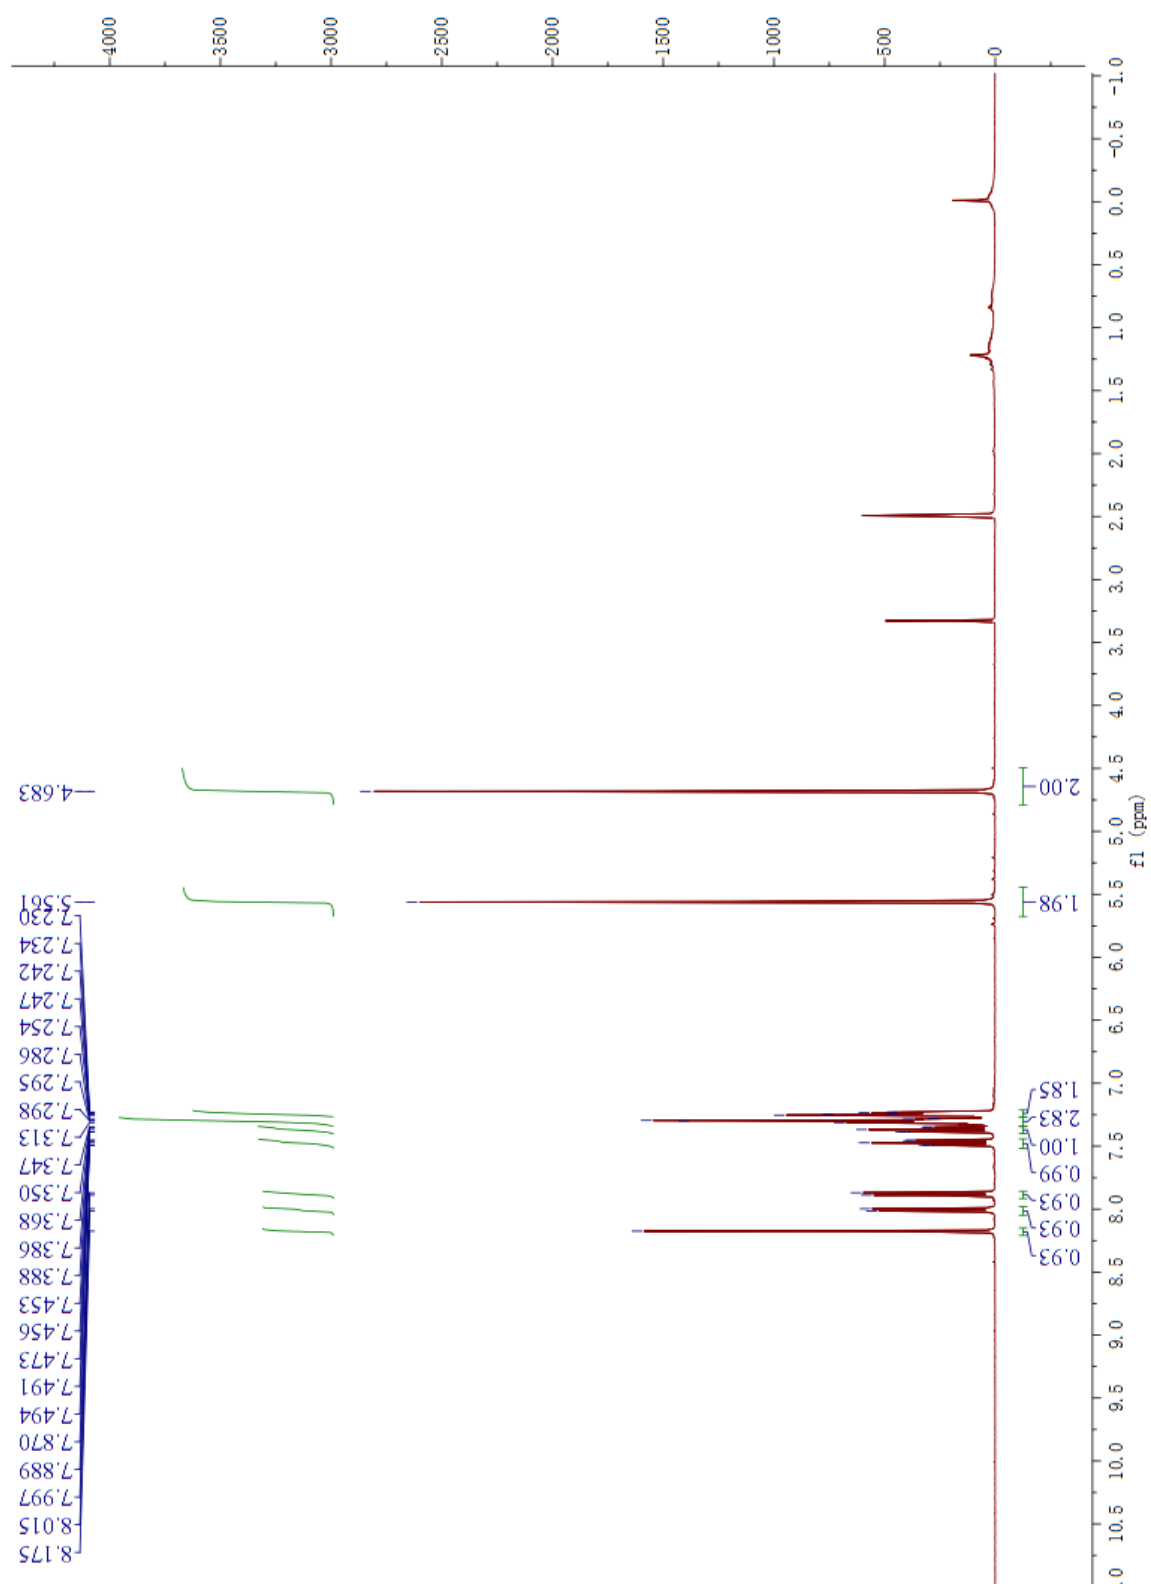

Figure S 13: <sup>1</sup>H NMR of compound 6g

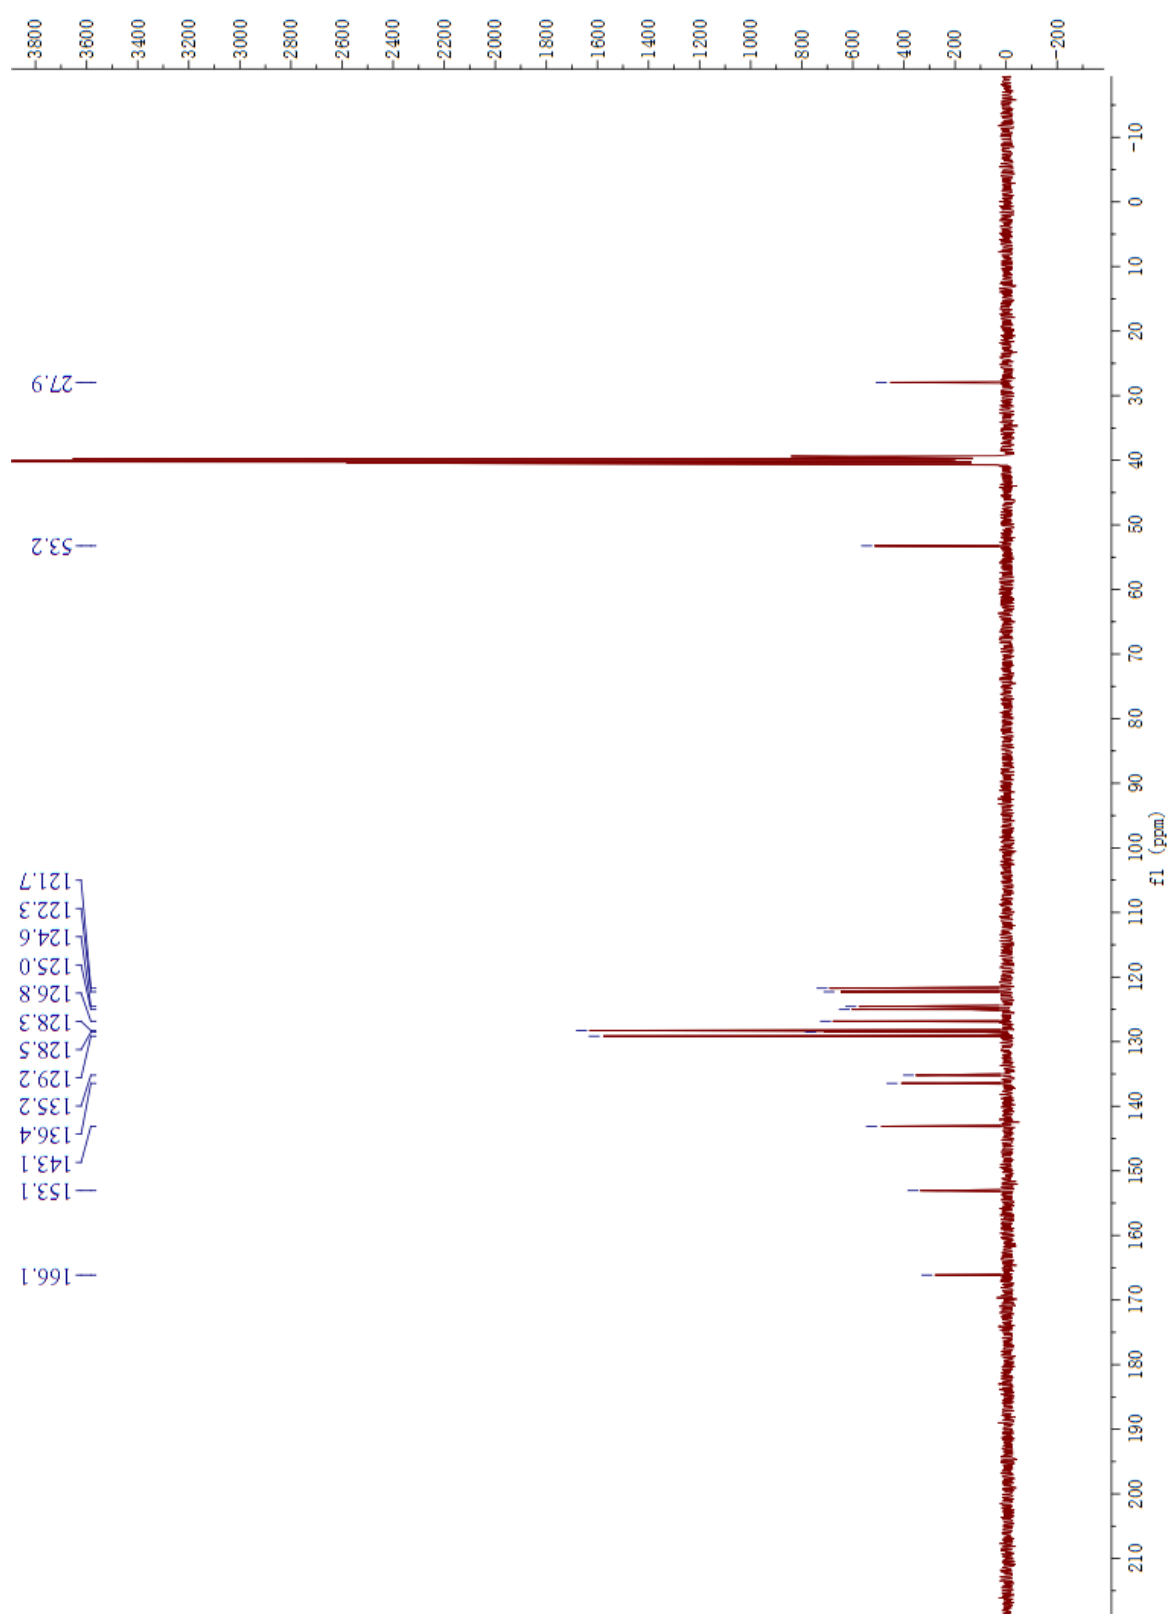

Figure S 14:  $^{13}\text{C}$  NMR of compound 6g

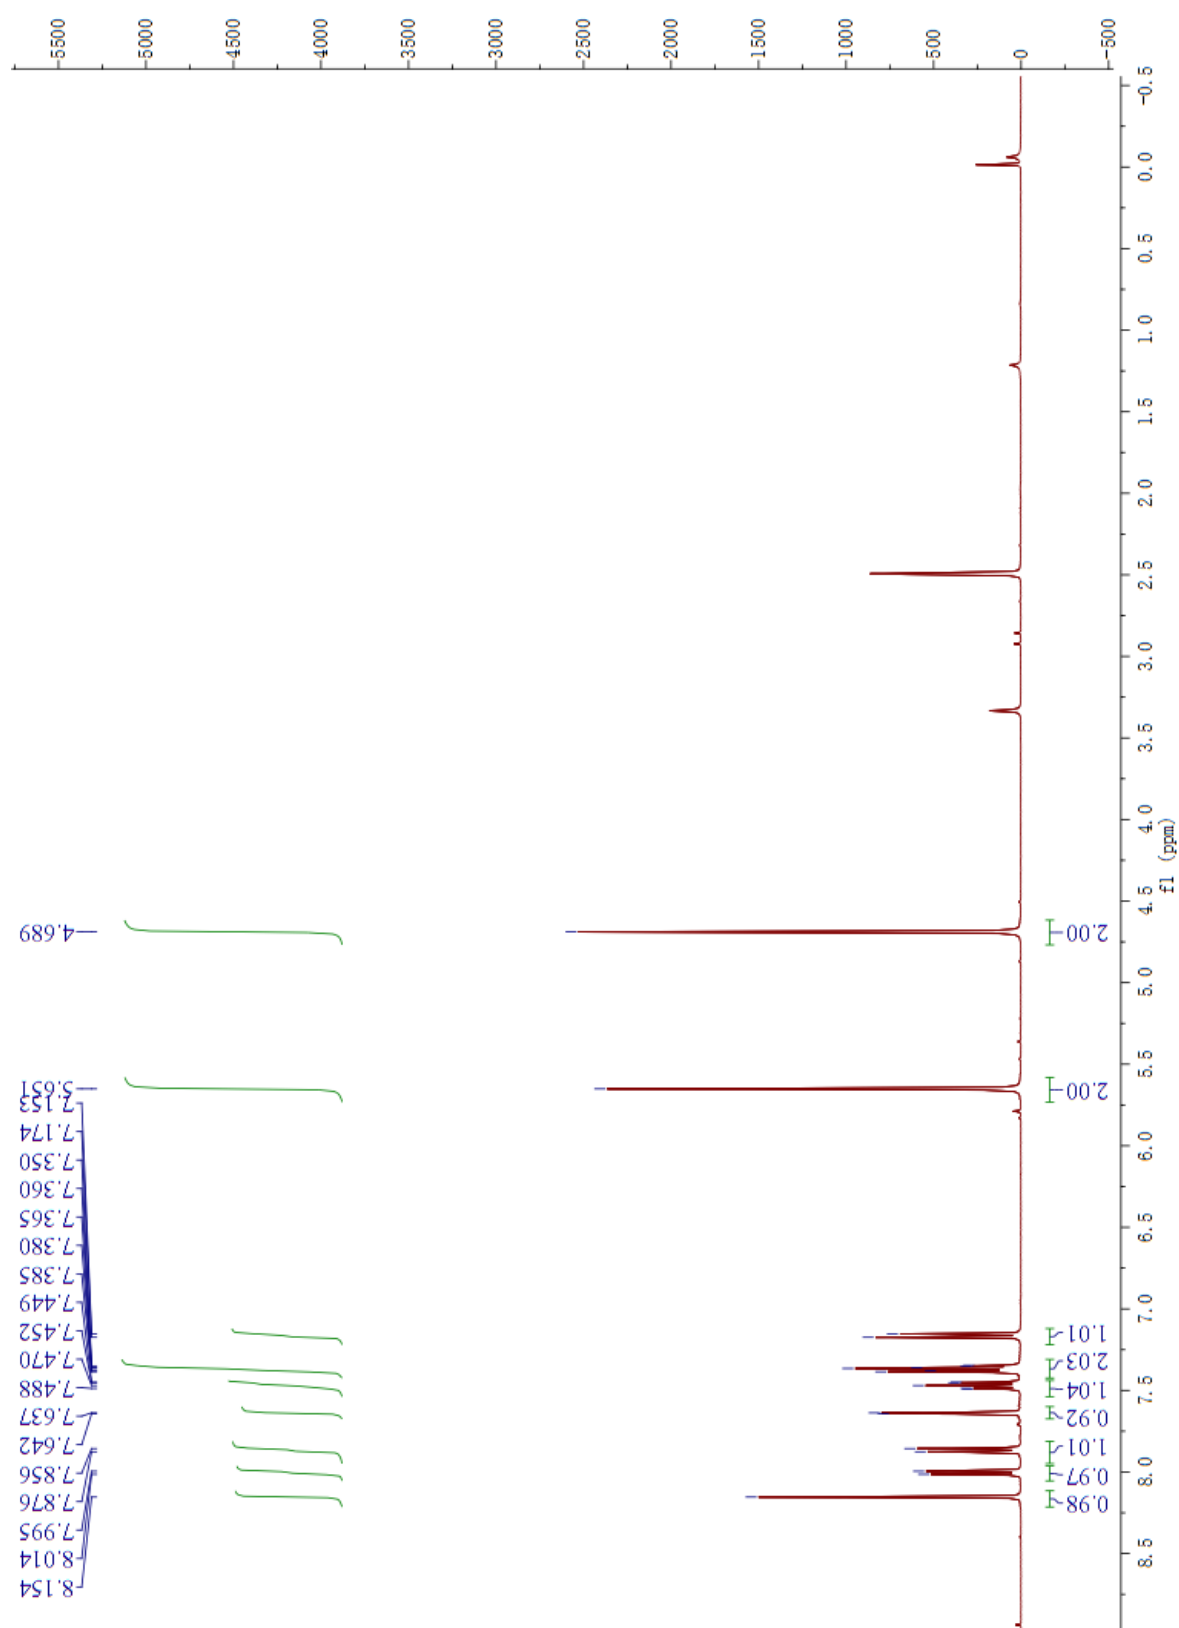

Figure S 15: <sup>1</sup>H NMR of compound 6h



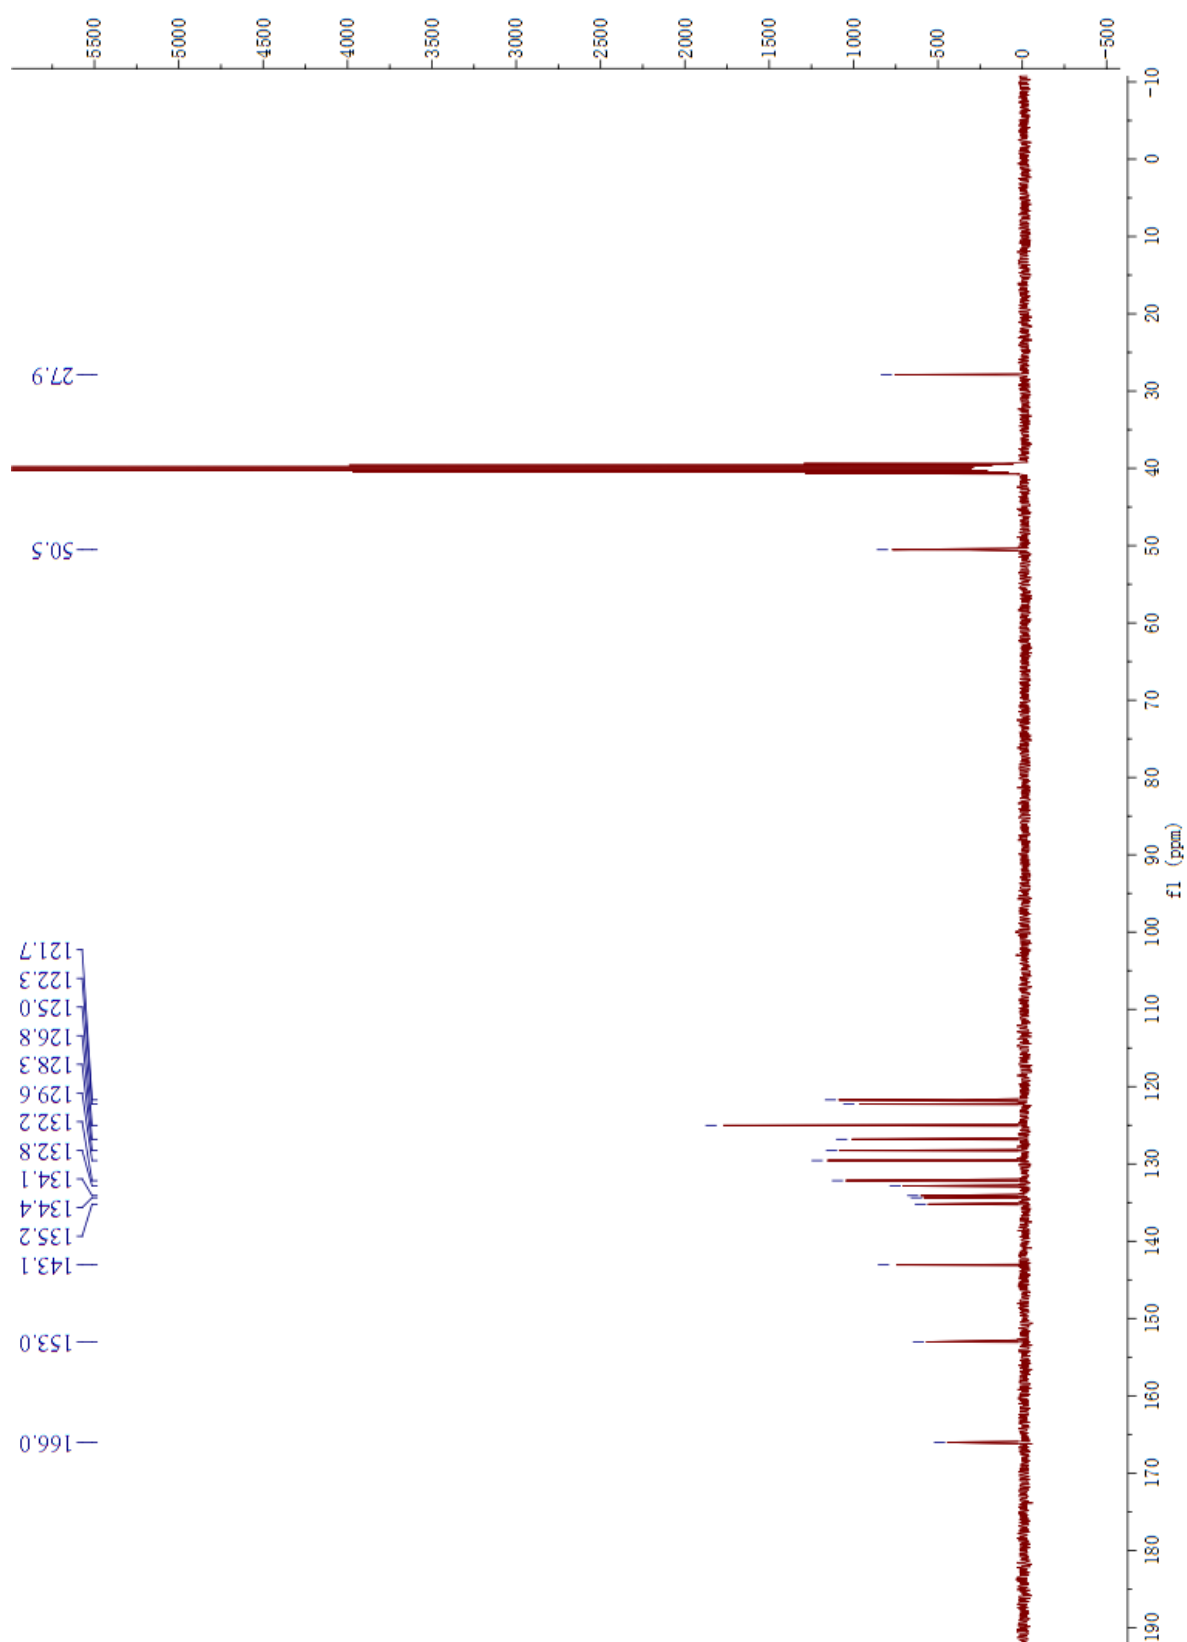

Figure S 16: <sup>13</sup>C NMR of compound 6h

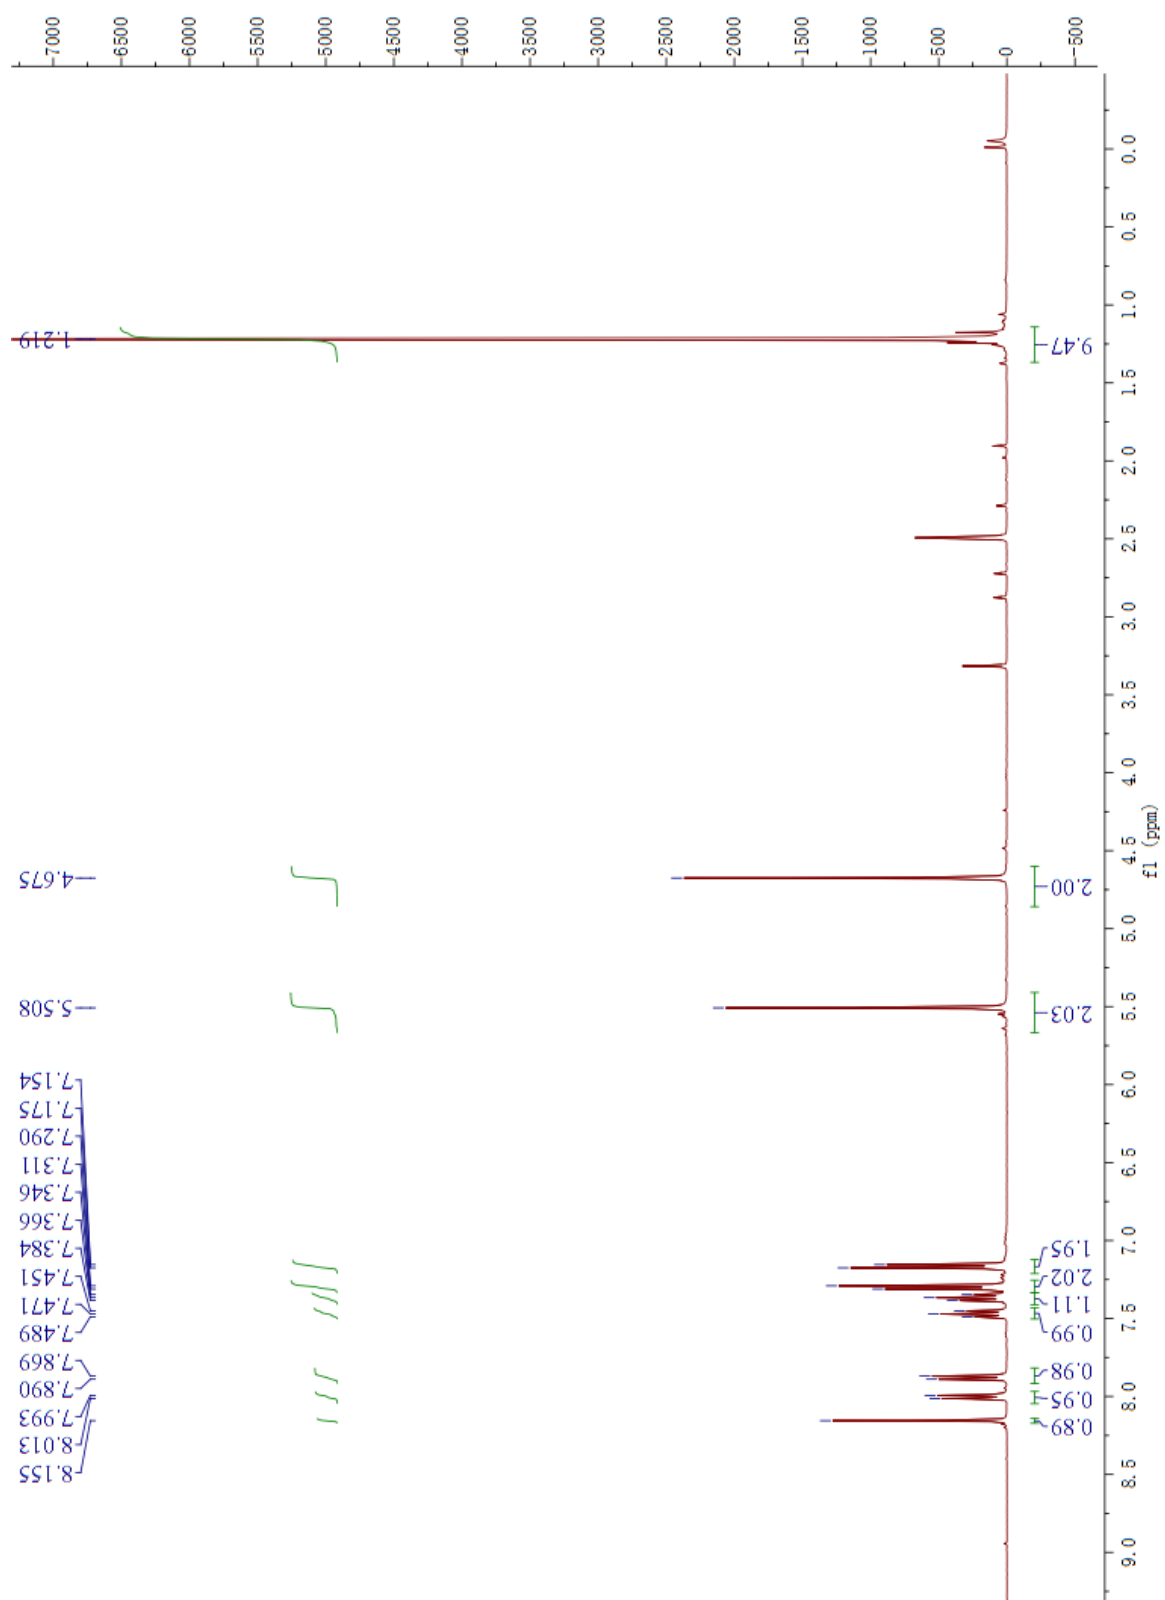

Figure S 17: <sup>1</sup>H NMR of compound 6i

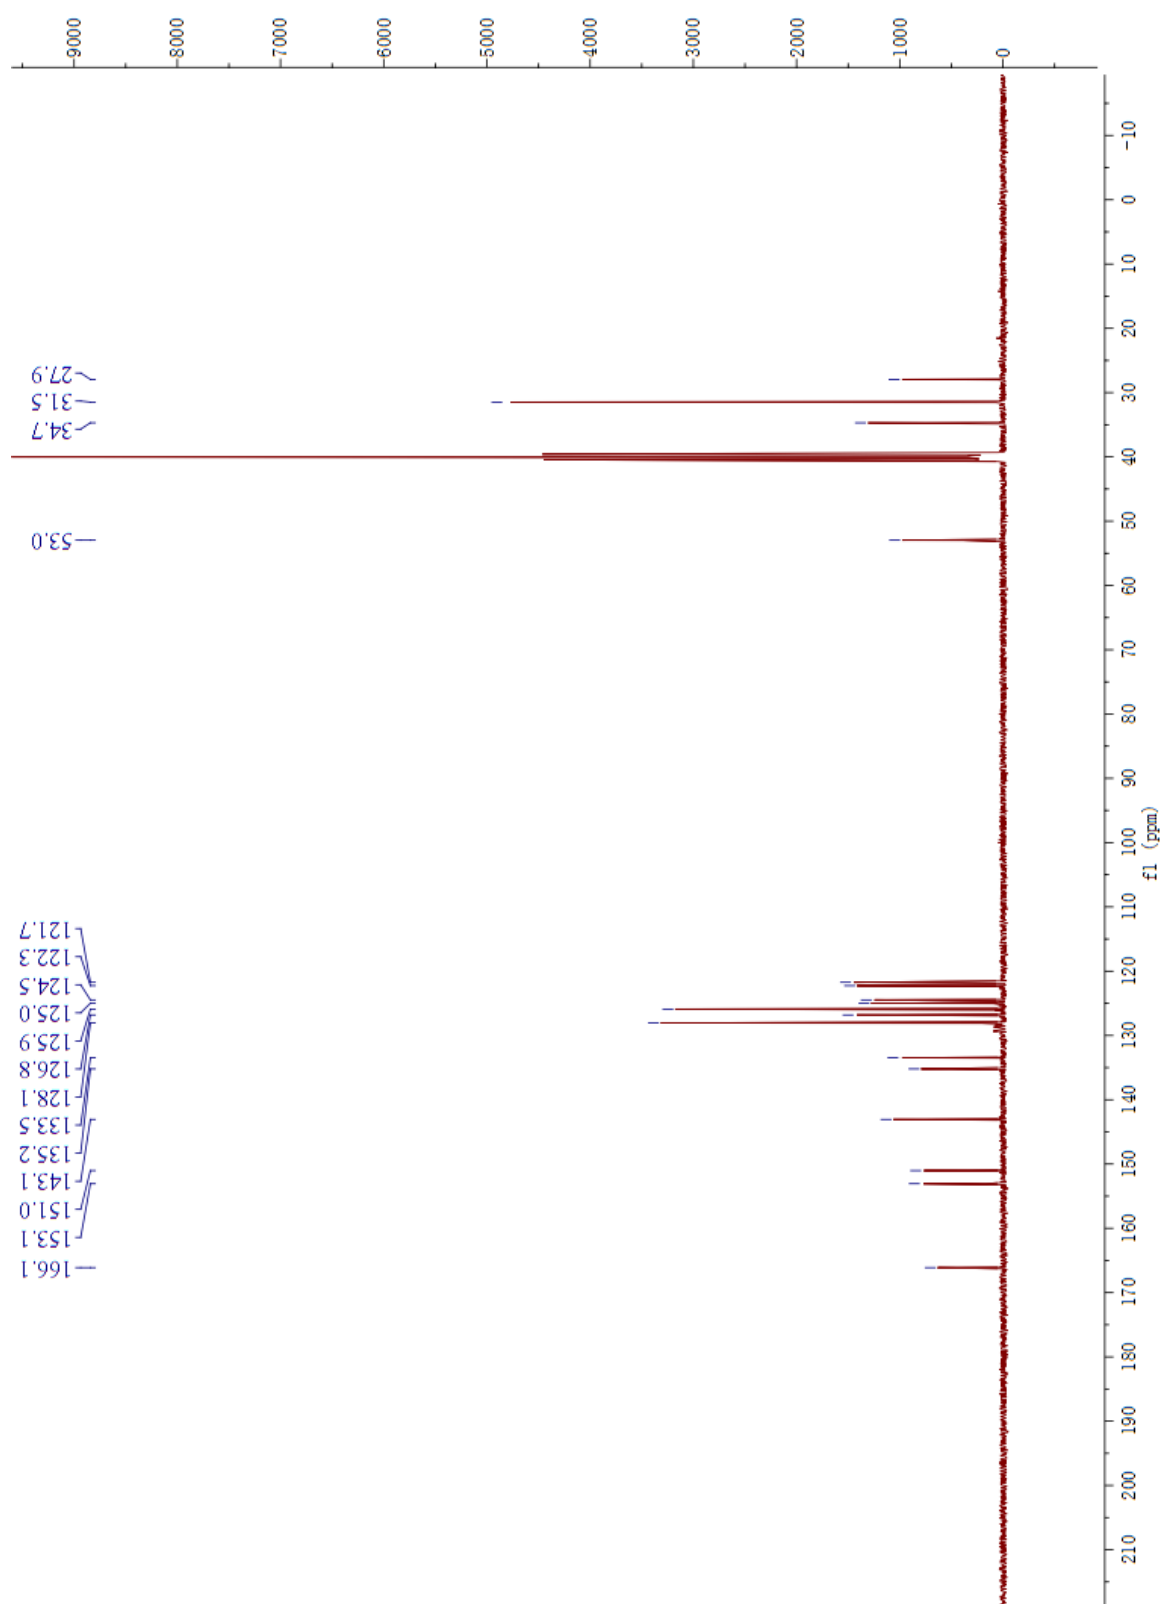

Figure S 18: <sup>13</sup>C NMR of compound 6i

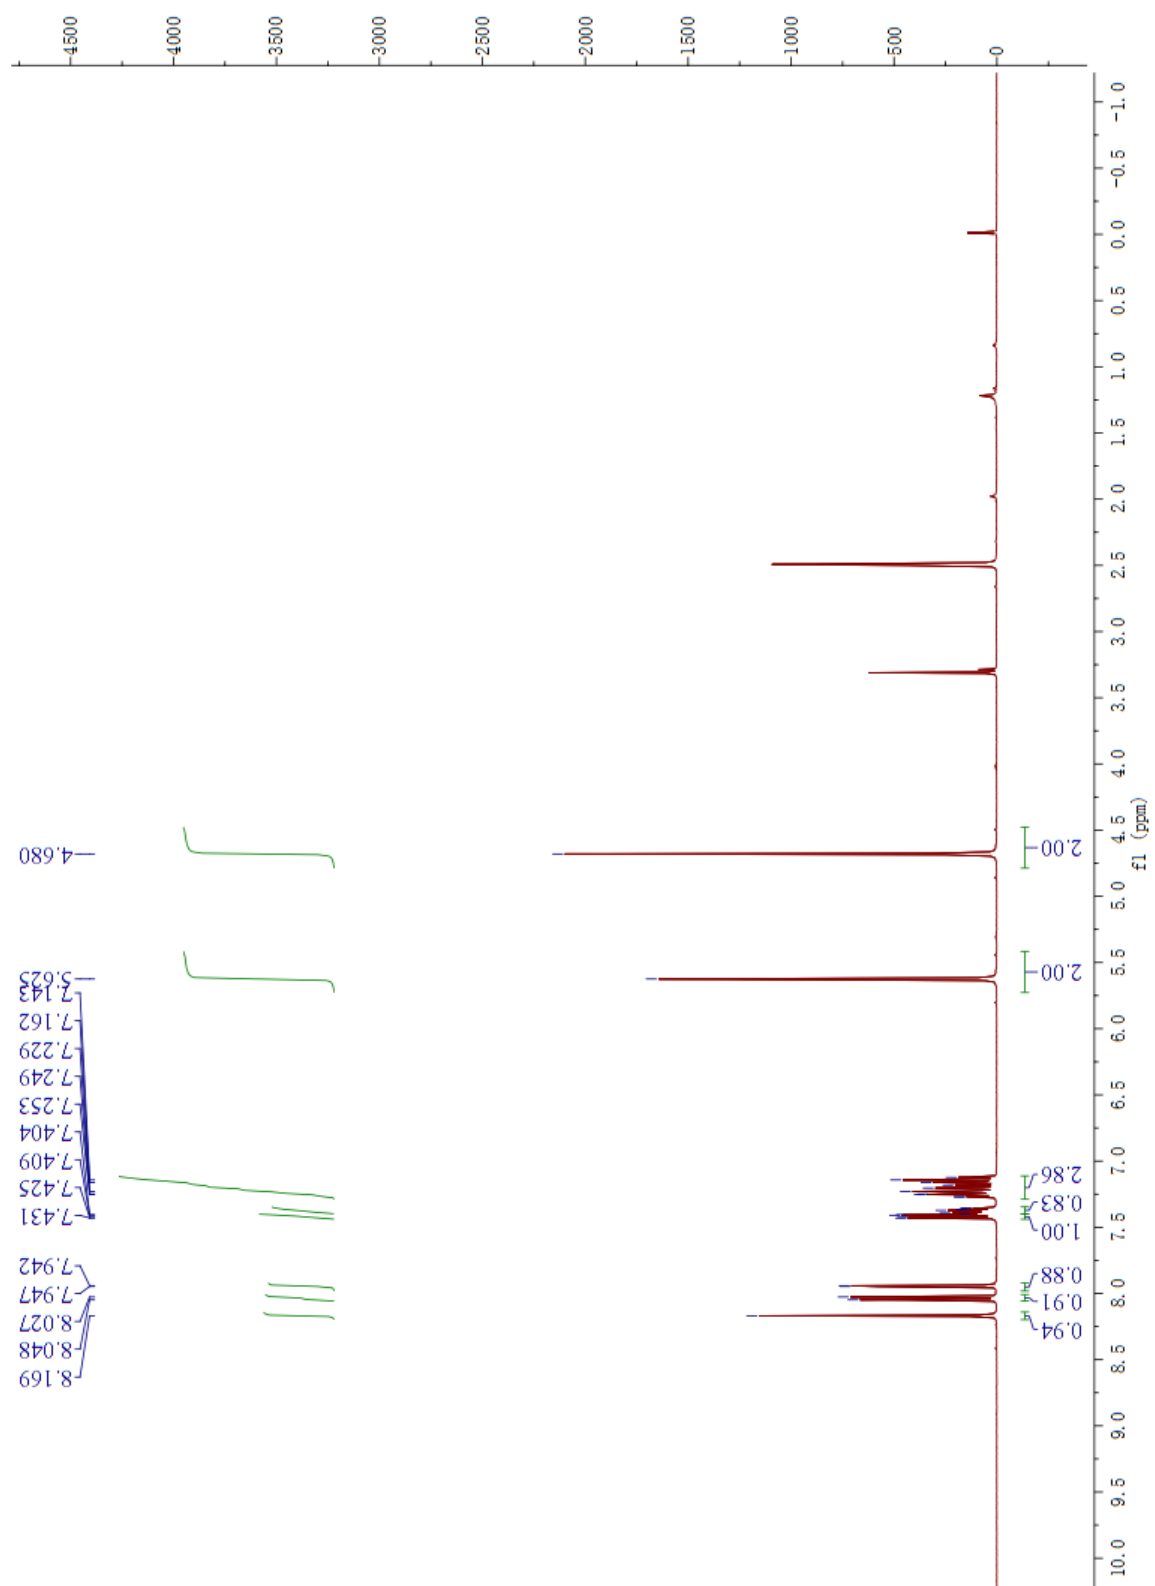

Figure S 19:  $^1\text{H}$  NMR of compound 6j

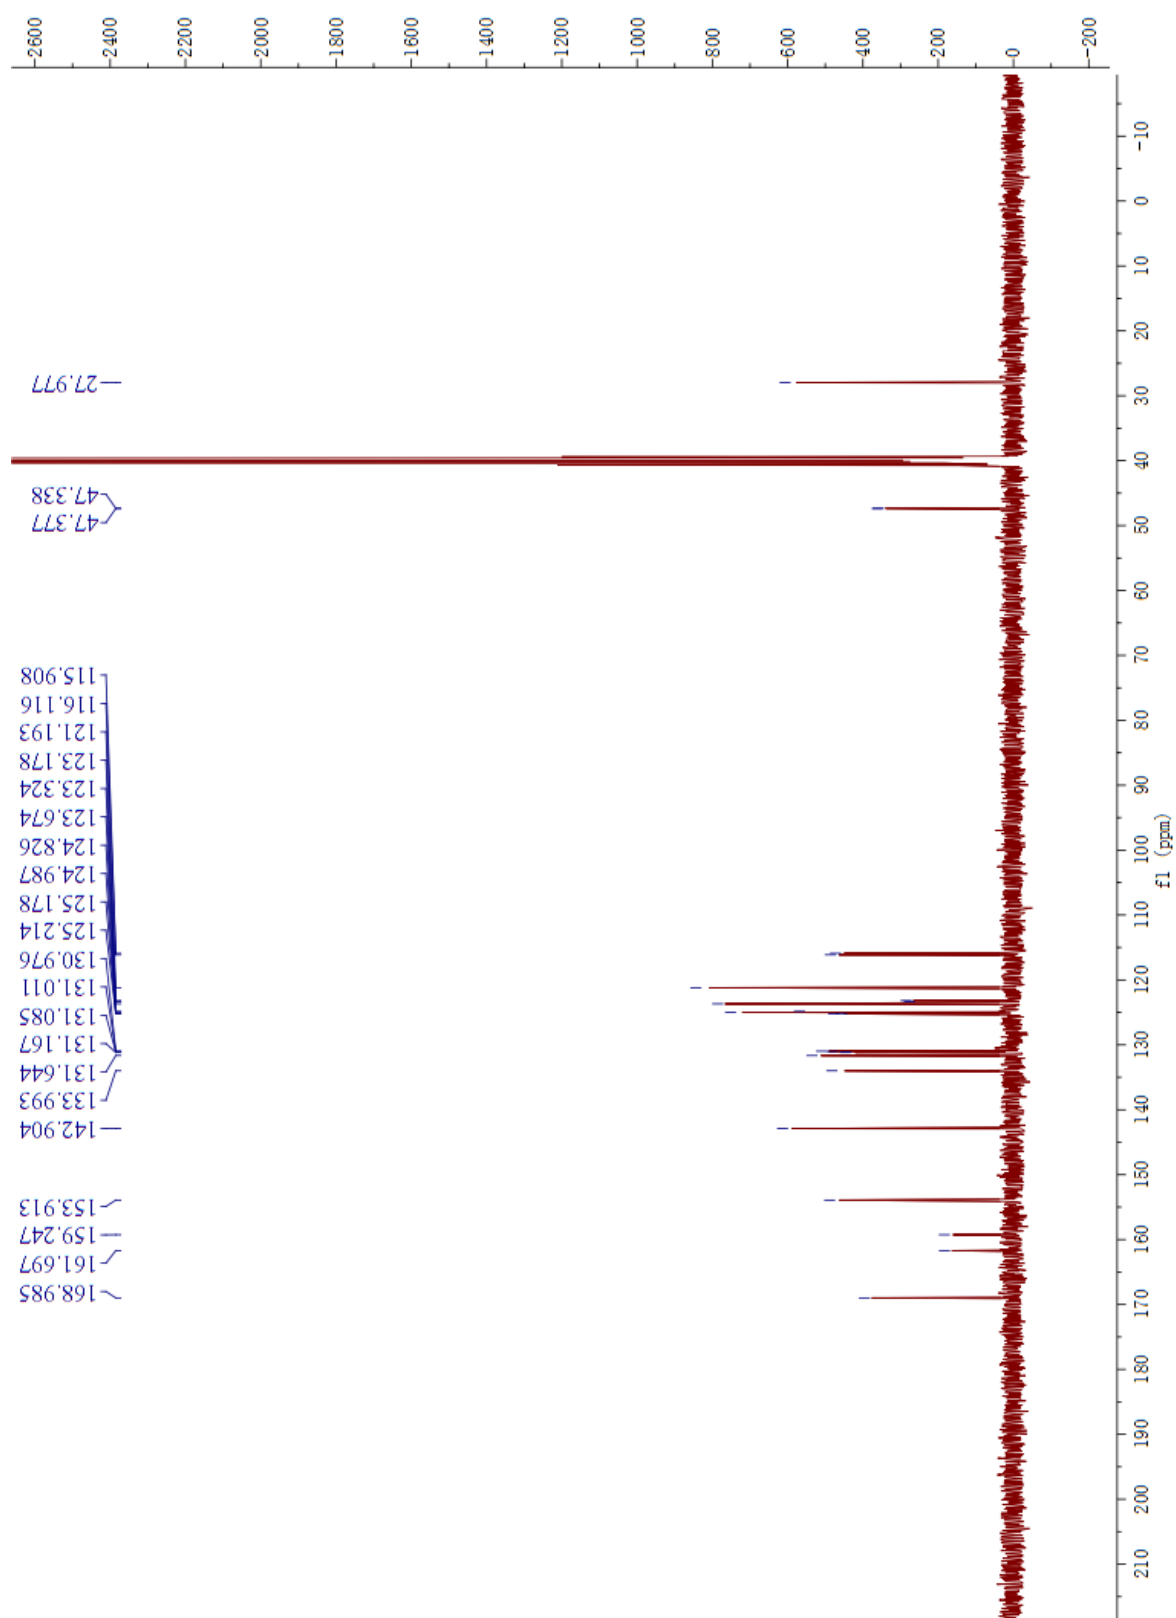

Figure S 20:  $^{13}\text{C}$  NMR of compound 6j

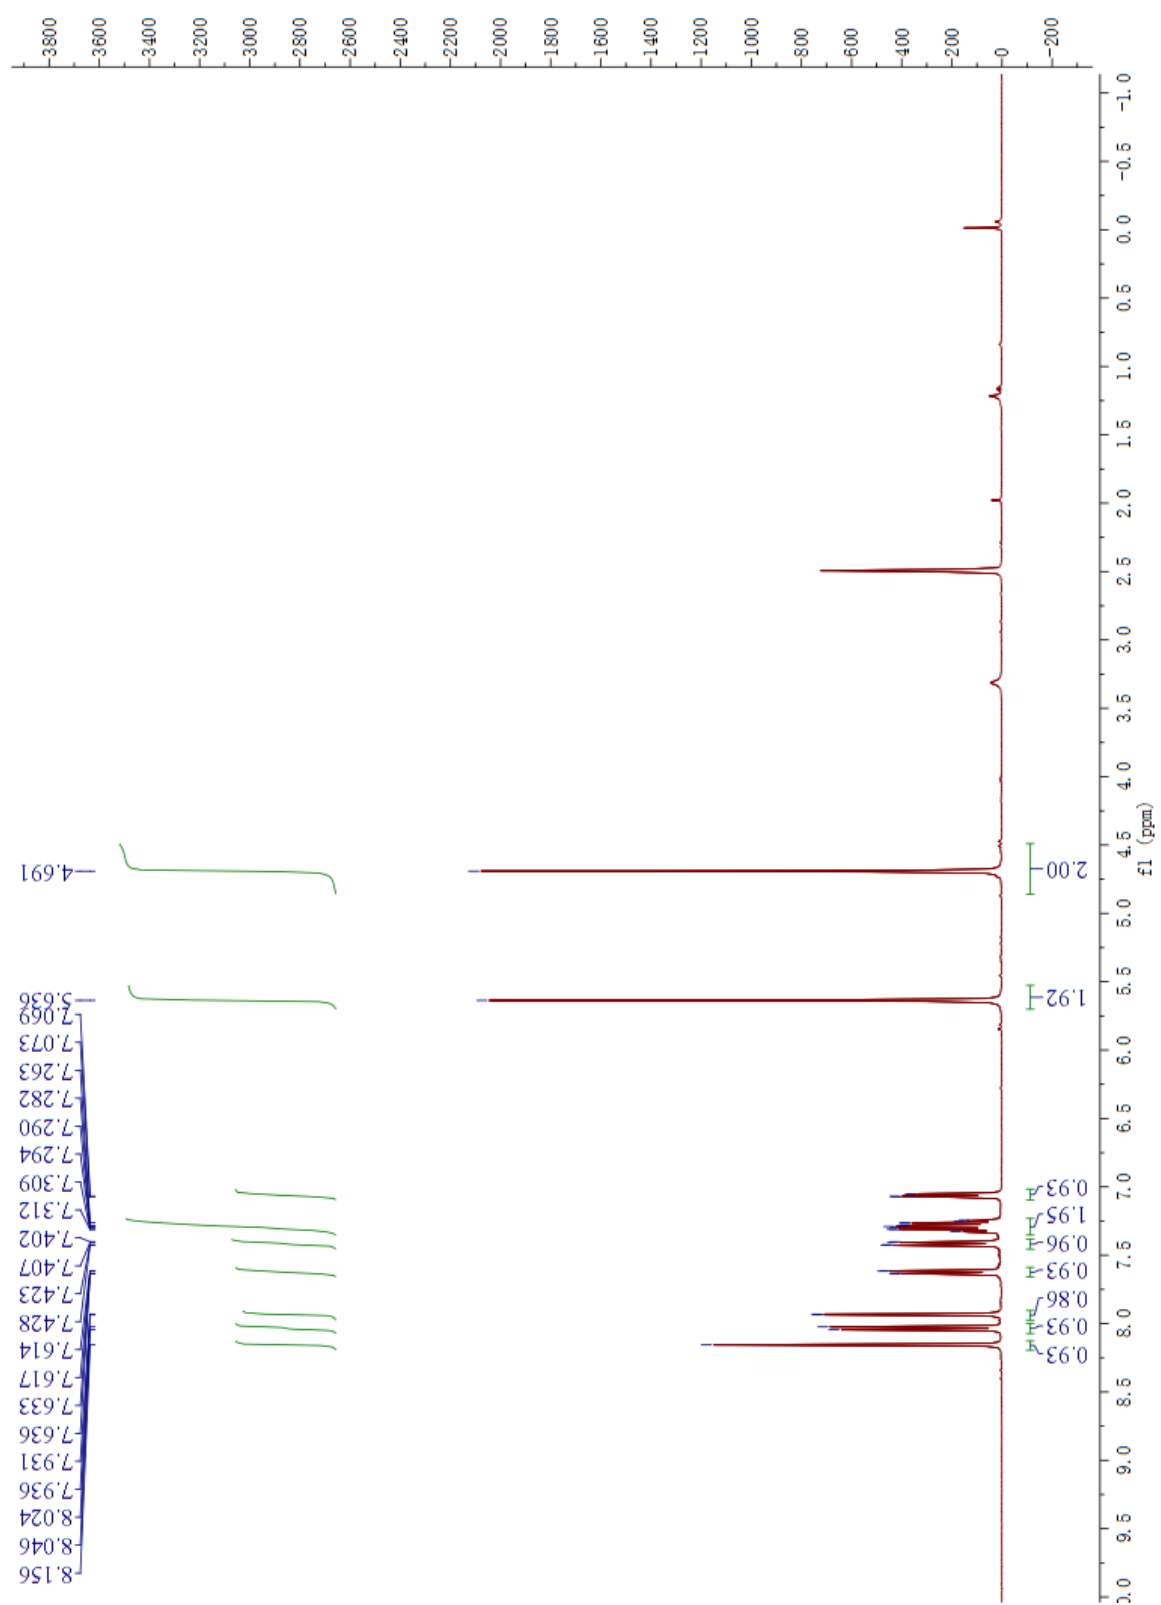

**Figure S 21: <sup>1</sup>H NMR of compound 6k**

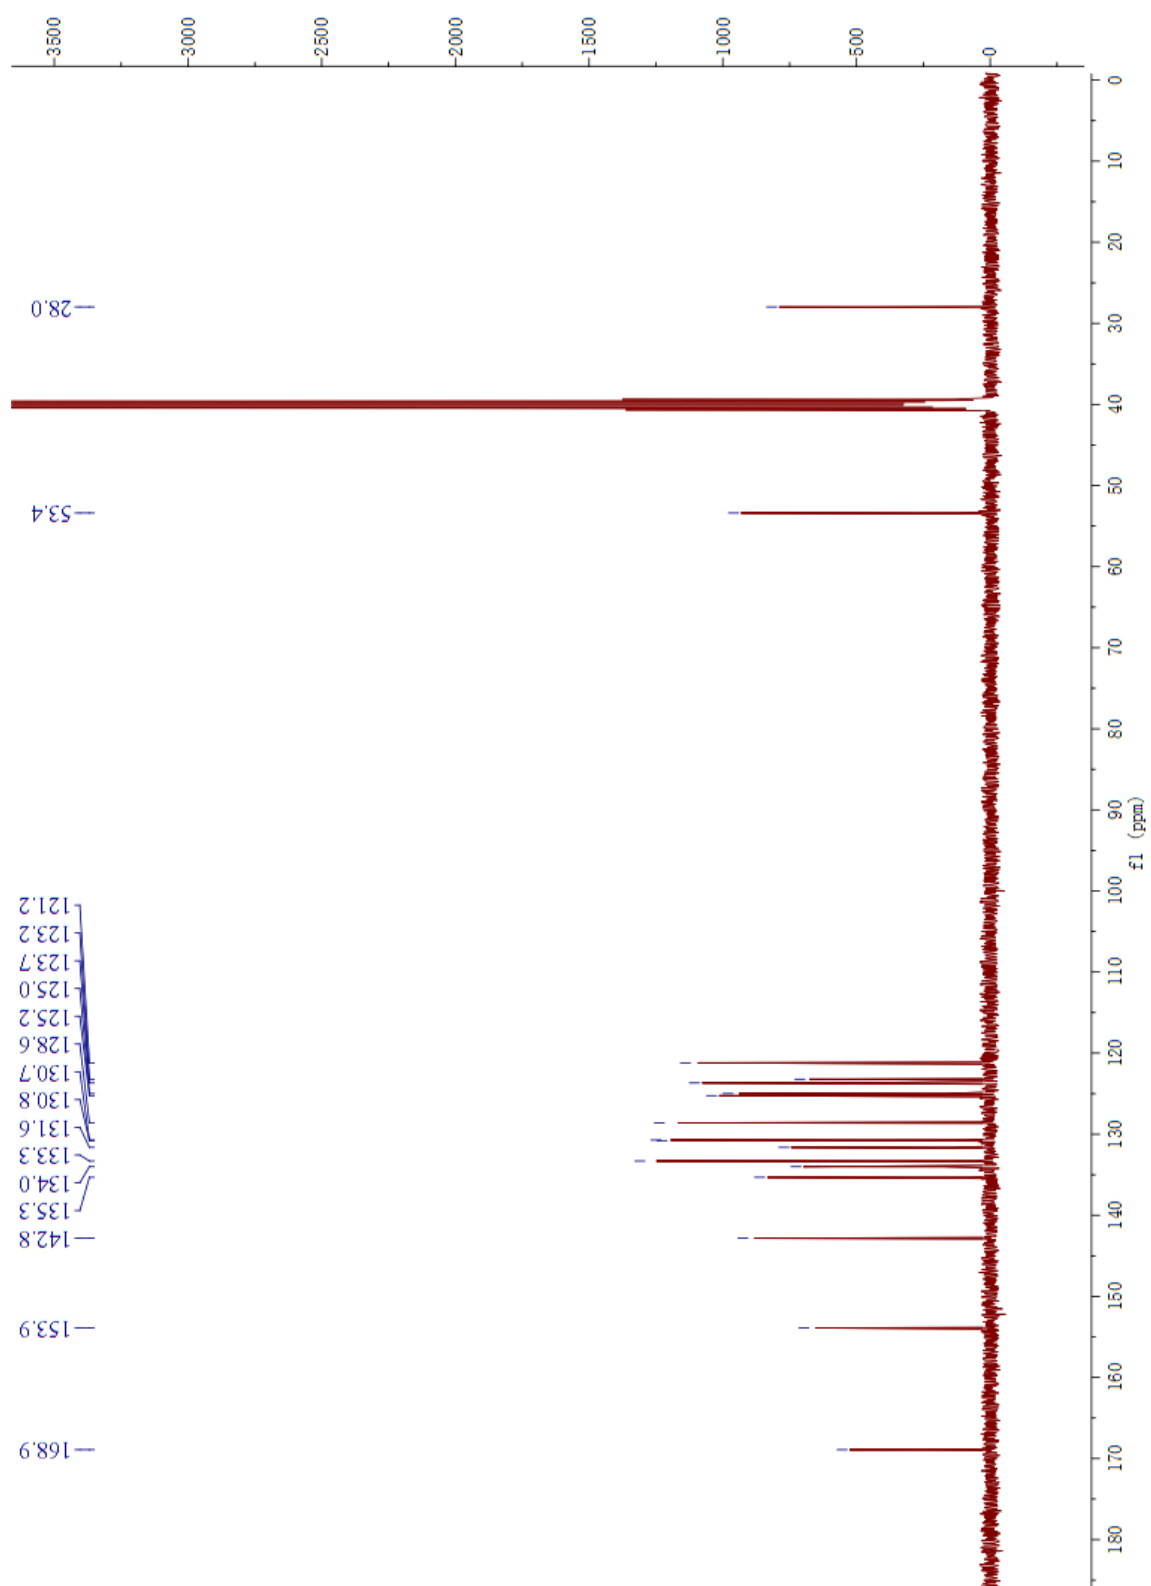

Figure S 22:  $^{13}\text{C}$  NMR of compound 6k

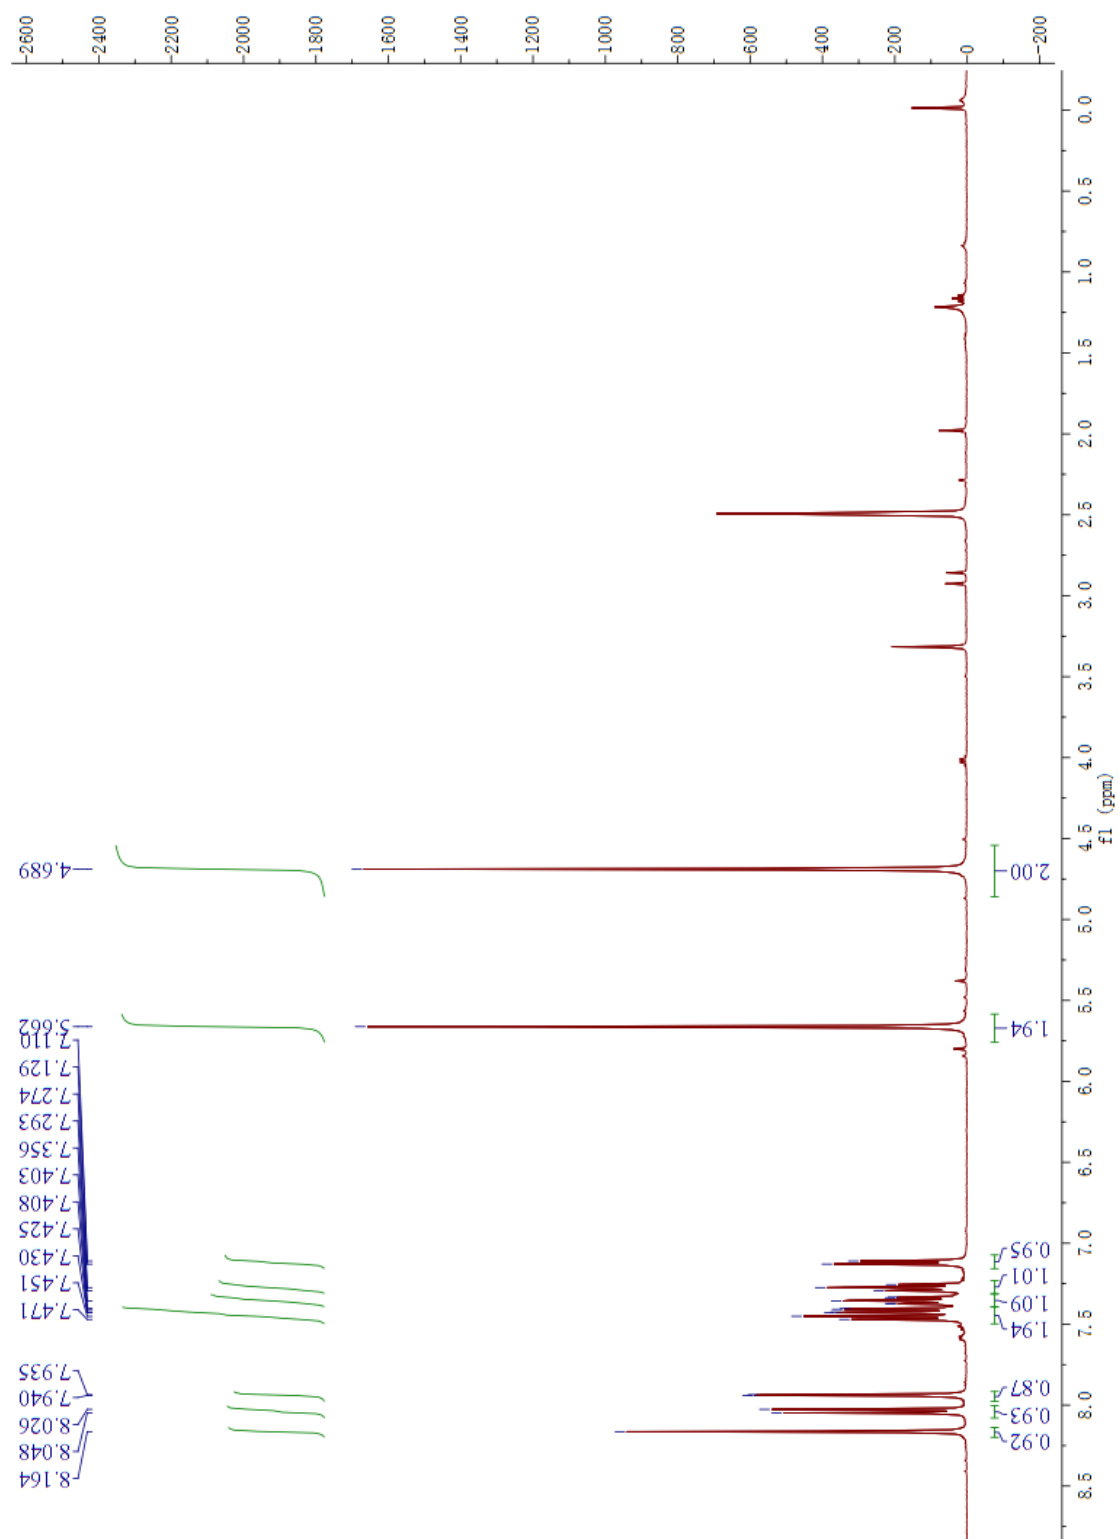

Figure S 23: <sup>1</sup>H NMR of compound 6l



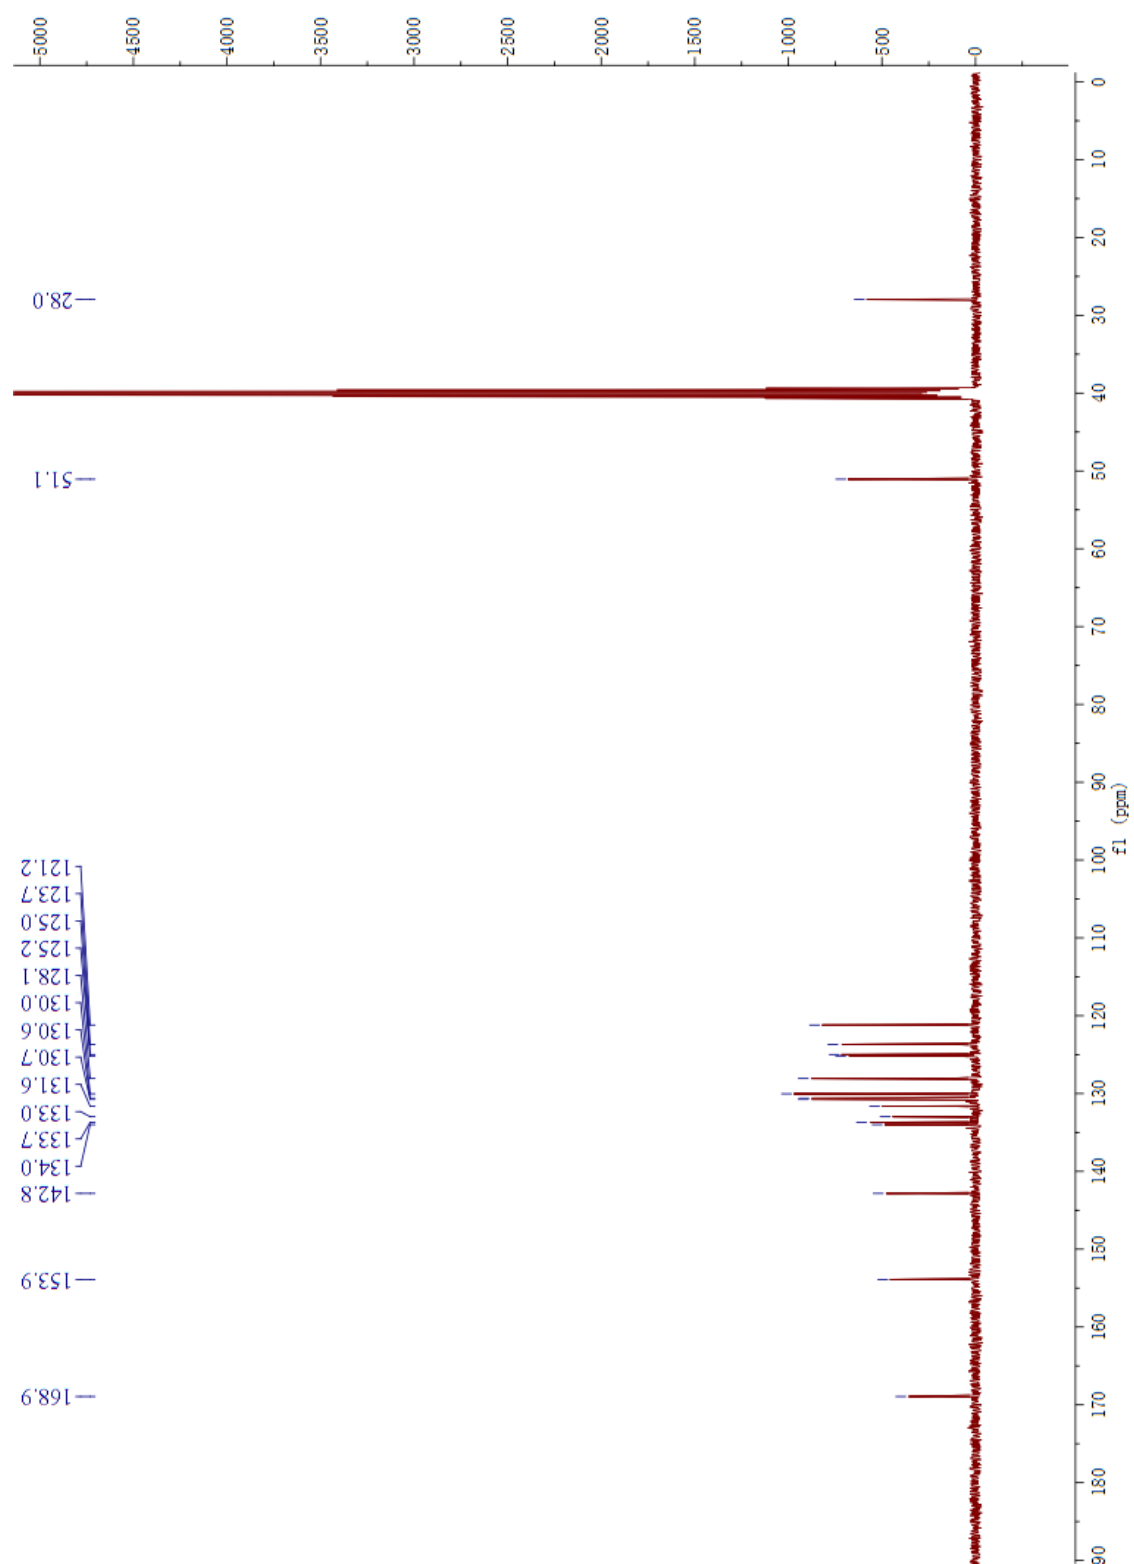

Figure S 24:  $^{13}\text{C}$  NMR of compound 6l

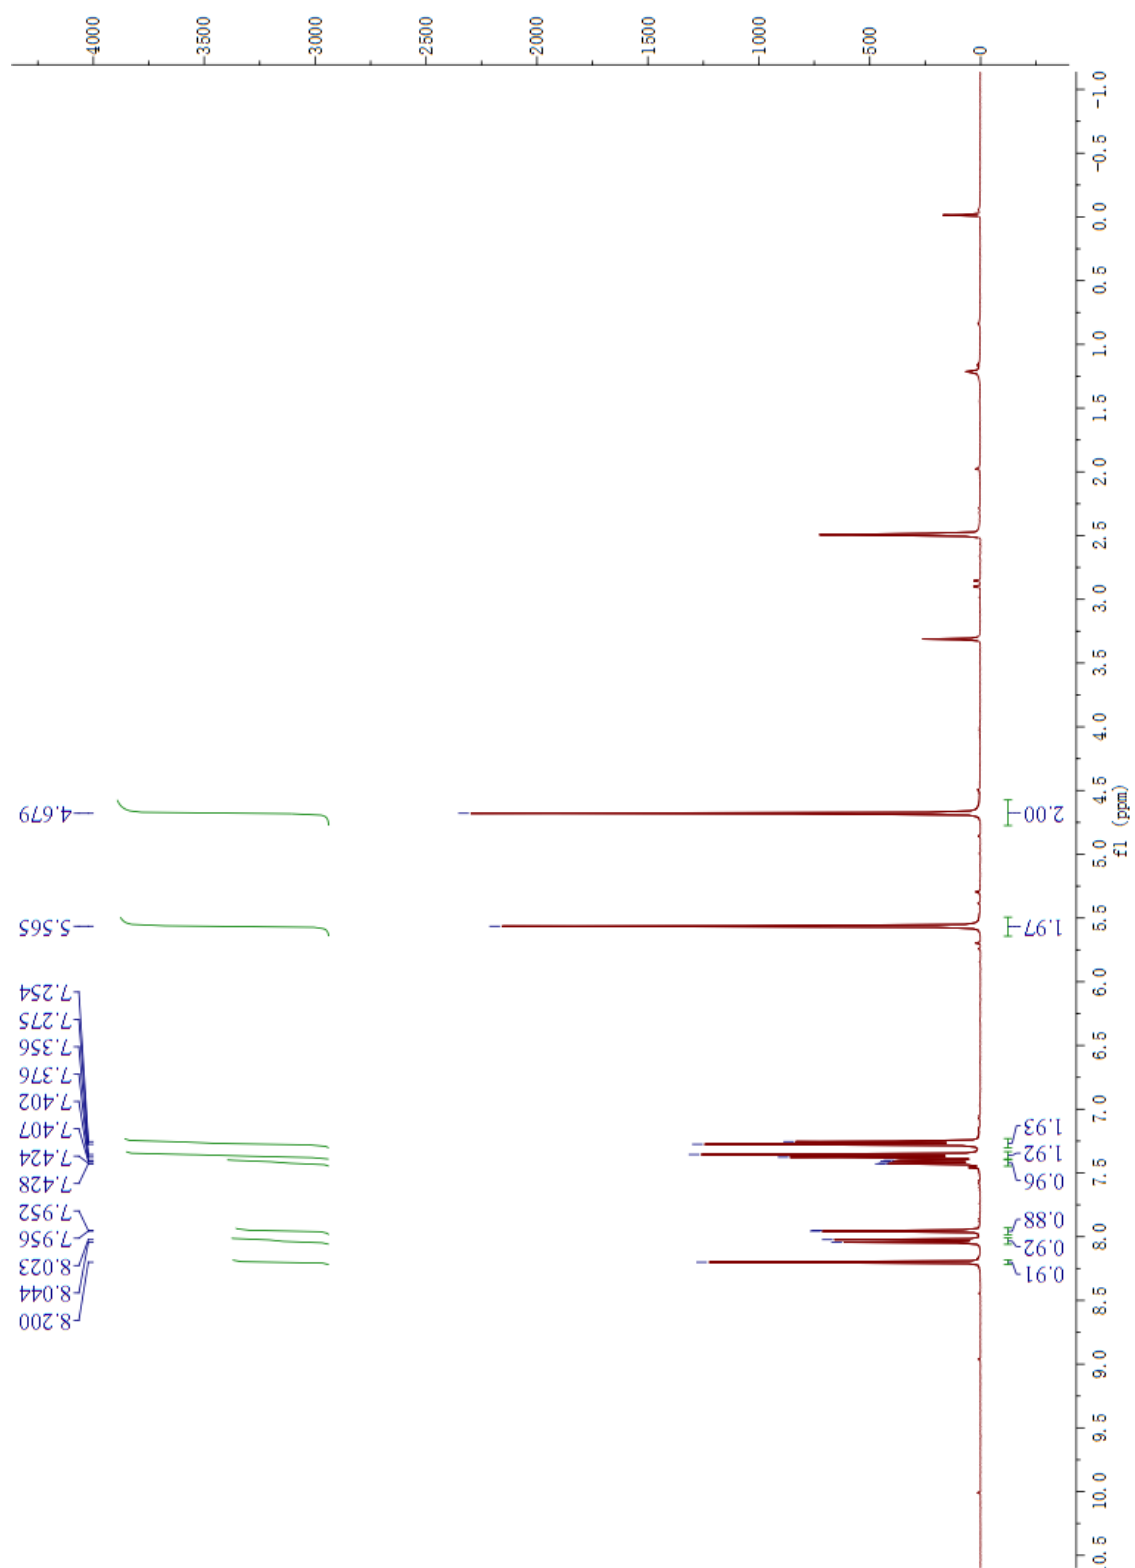

Figure S 25:  $^1\text{H}$  NMR of compound 6m

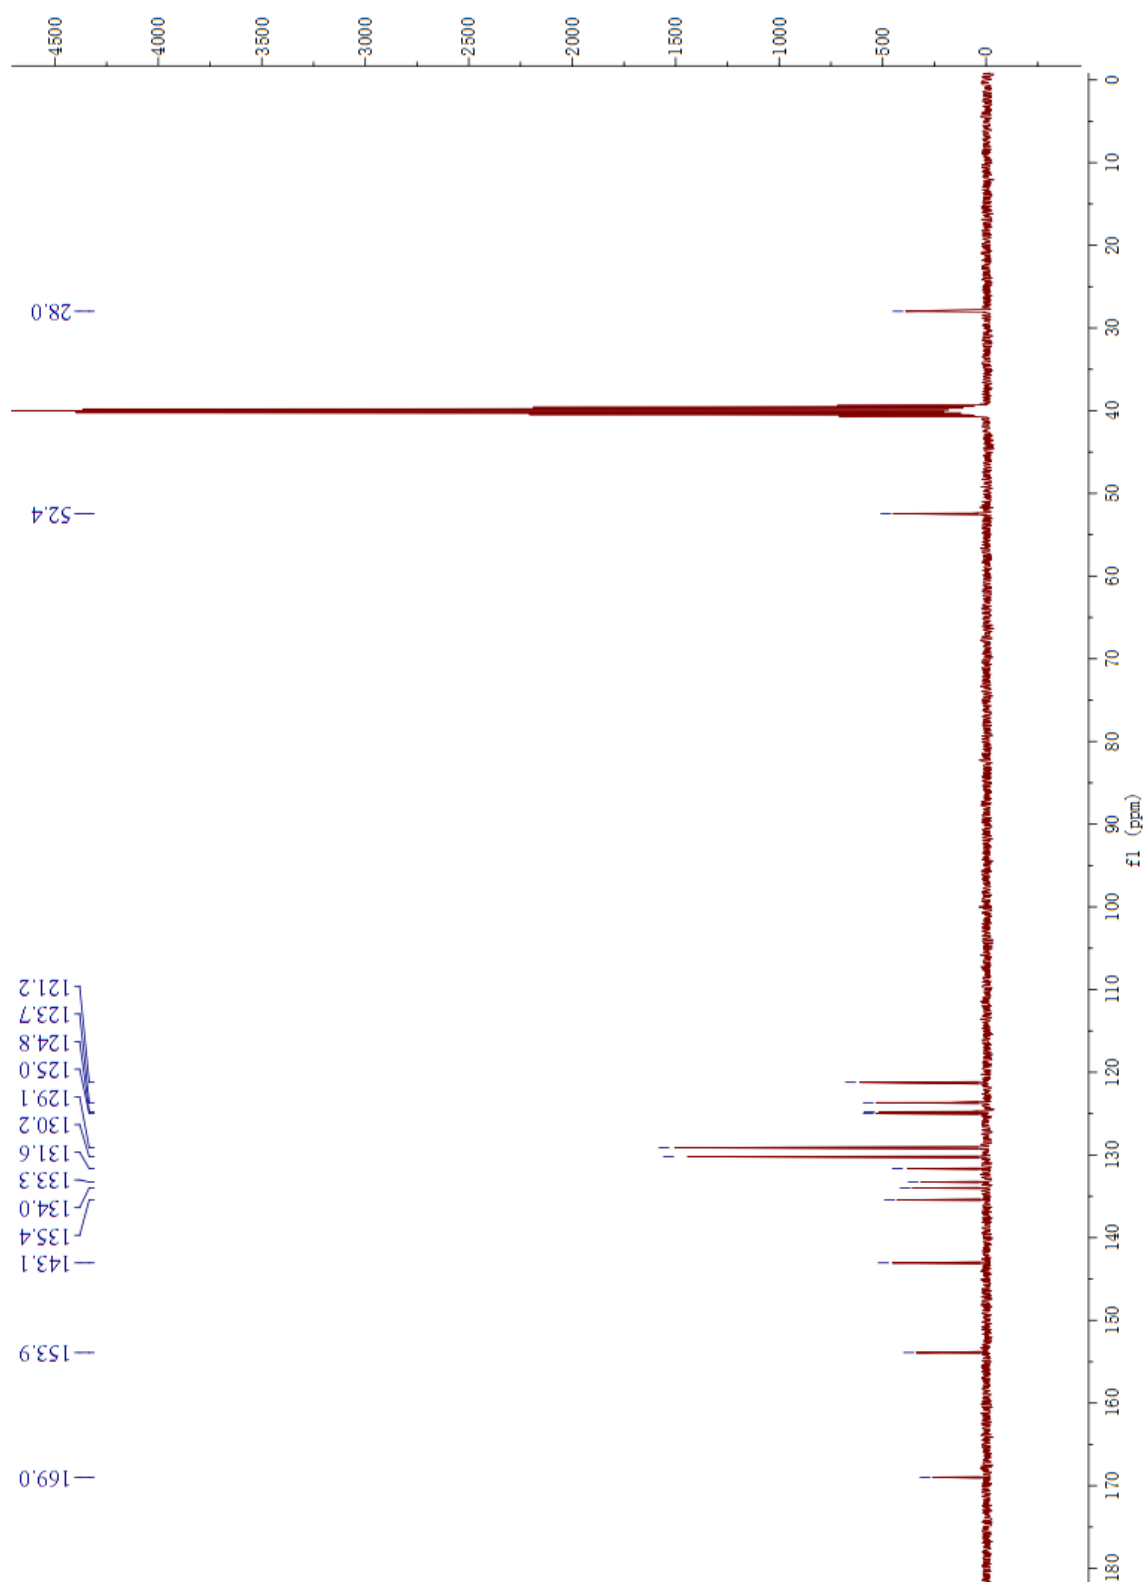

**Figure S 26:**  $^{13}\text{C}$  NMR of compound 6m

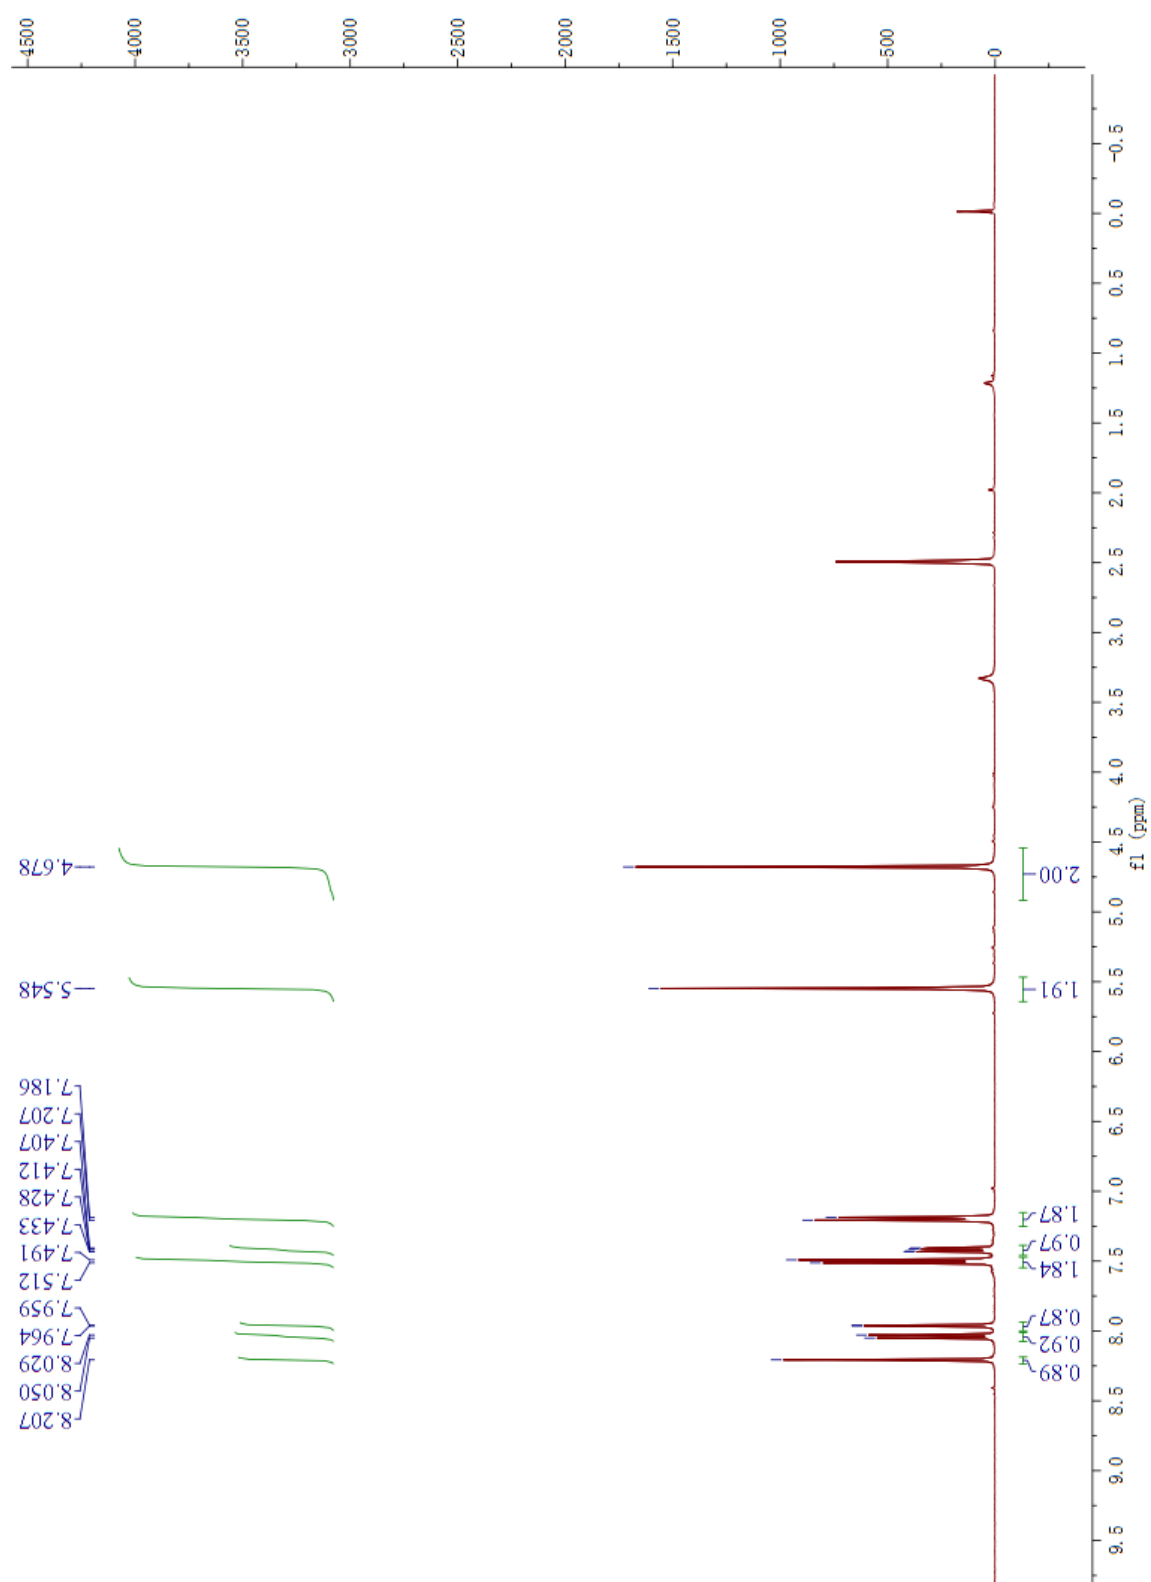

Figure S 27:  $^1\text{H}$  NMR of compound 6n

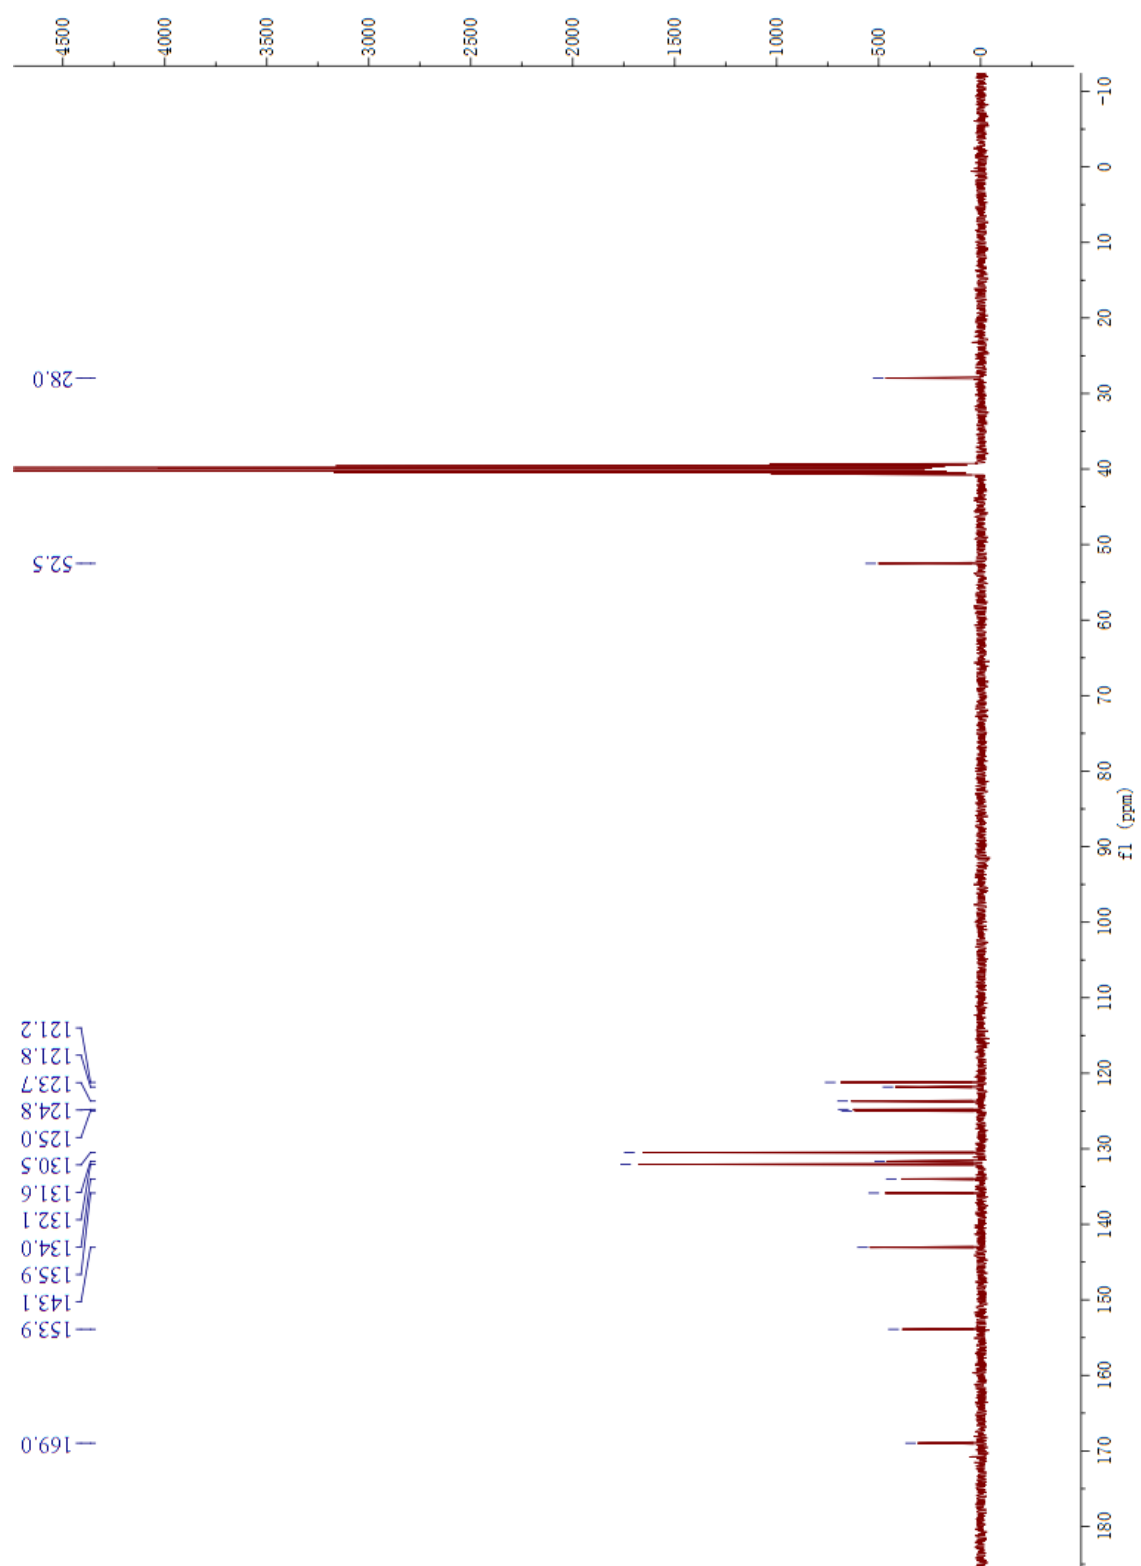

Figure S 28:  $^{13}\text{C}$  NMR of compound 6n

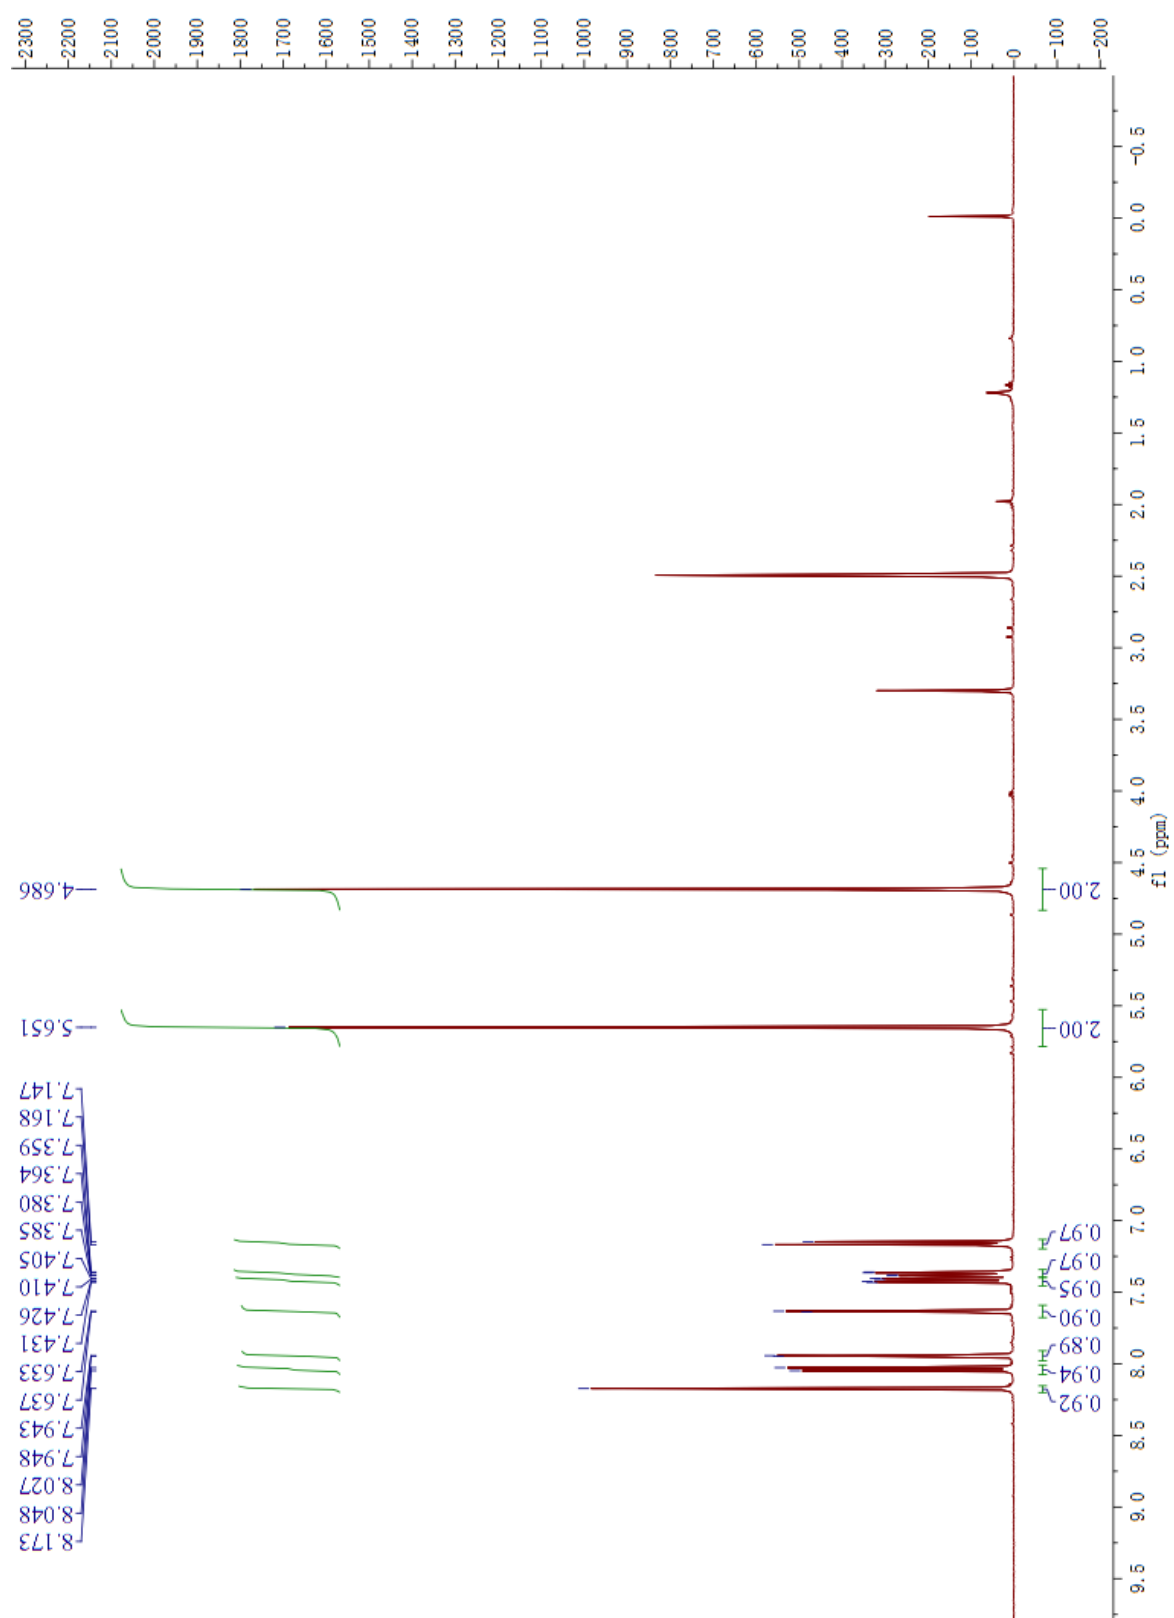

Figure S 29: <sup>1</sup>H NMR of compound 6o

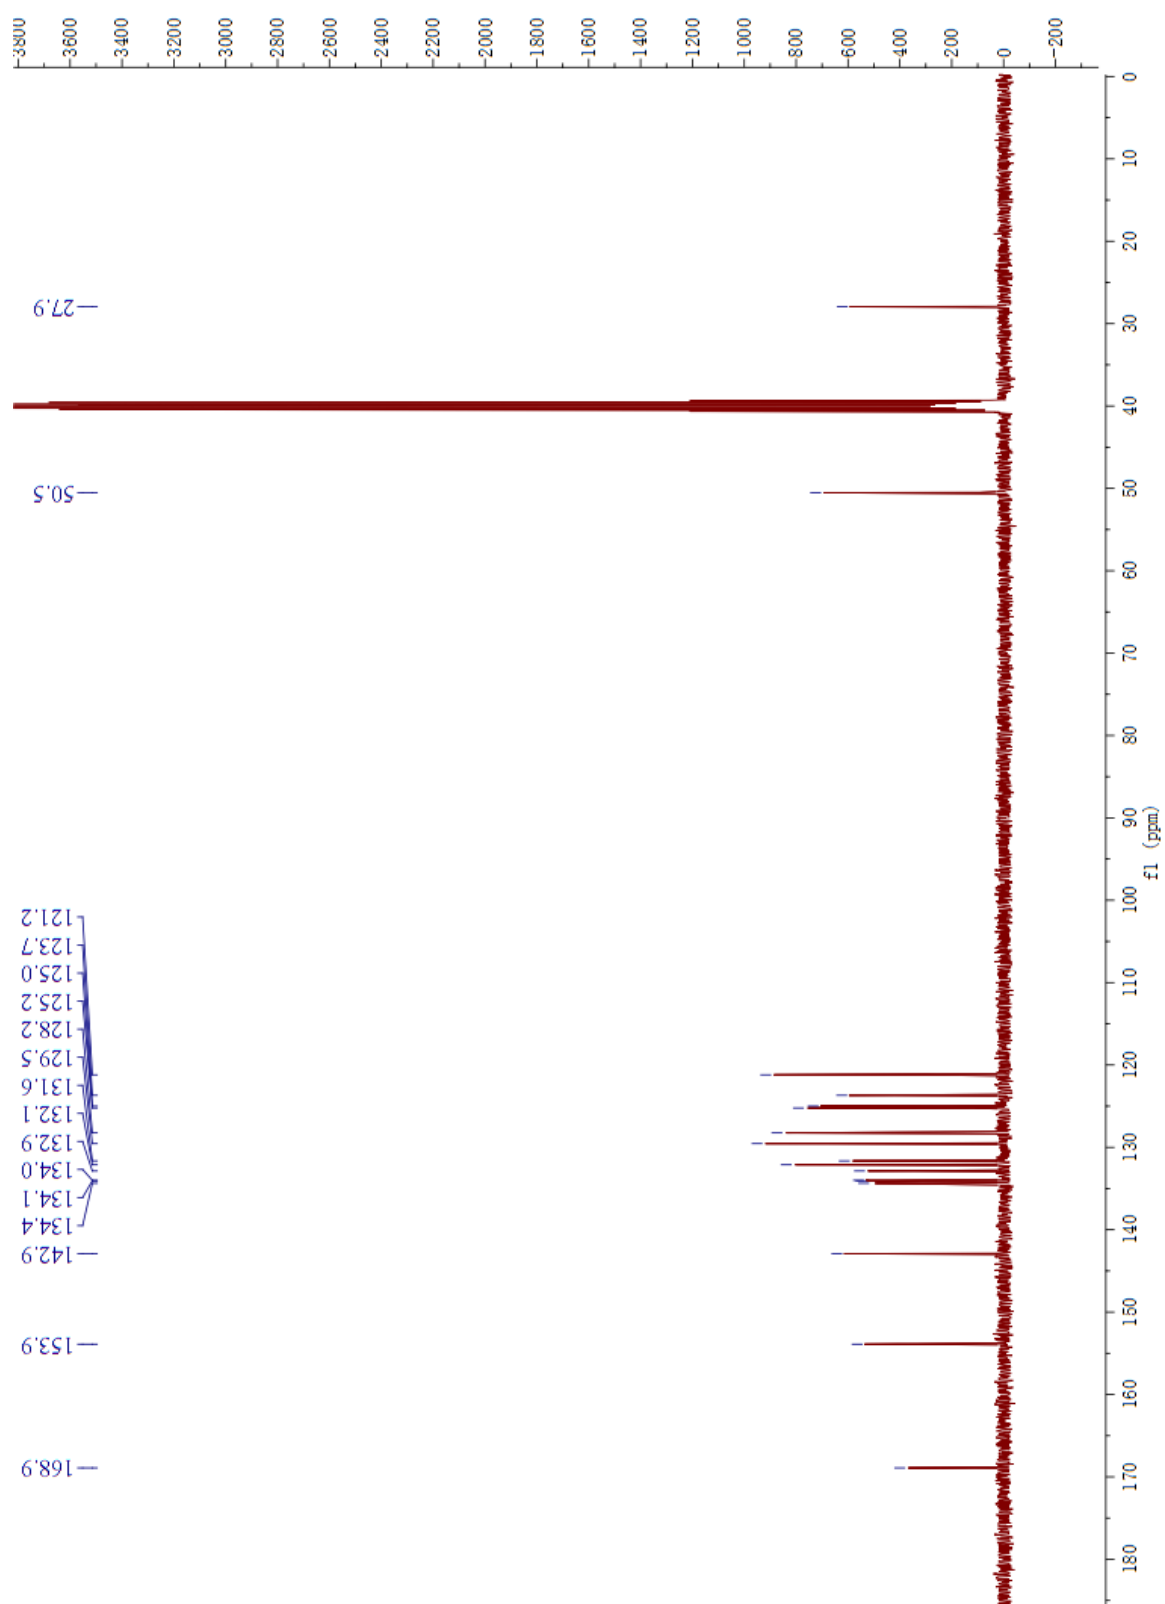

Figure S 30:  $^{13}\text{C}$  NMR of compound 60

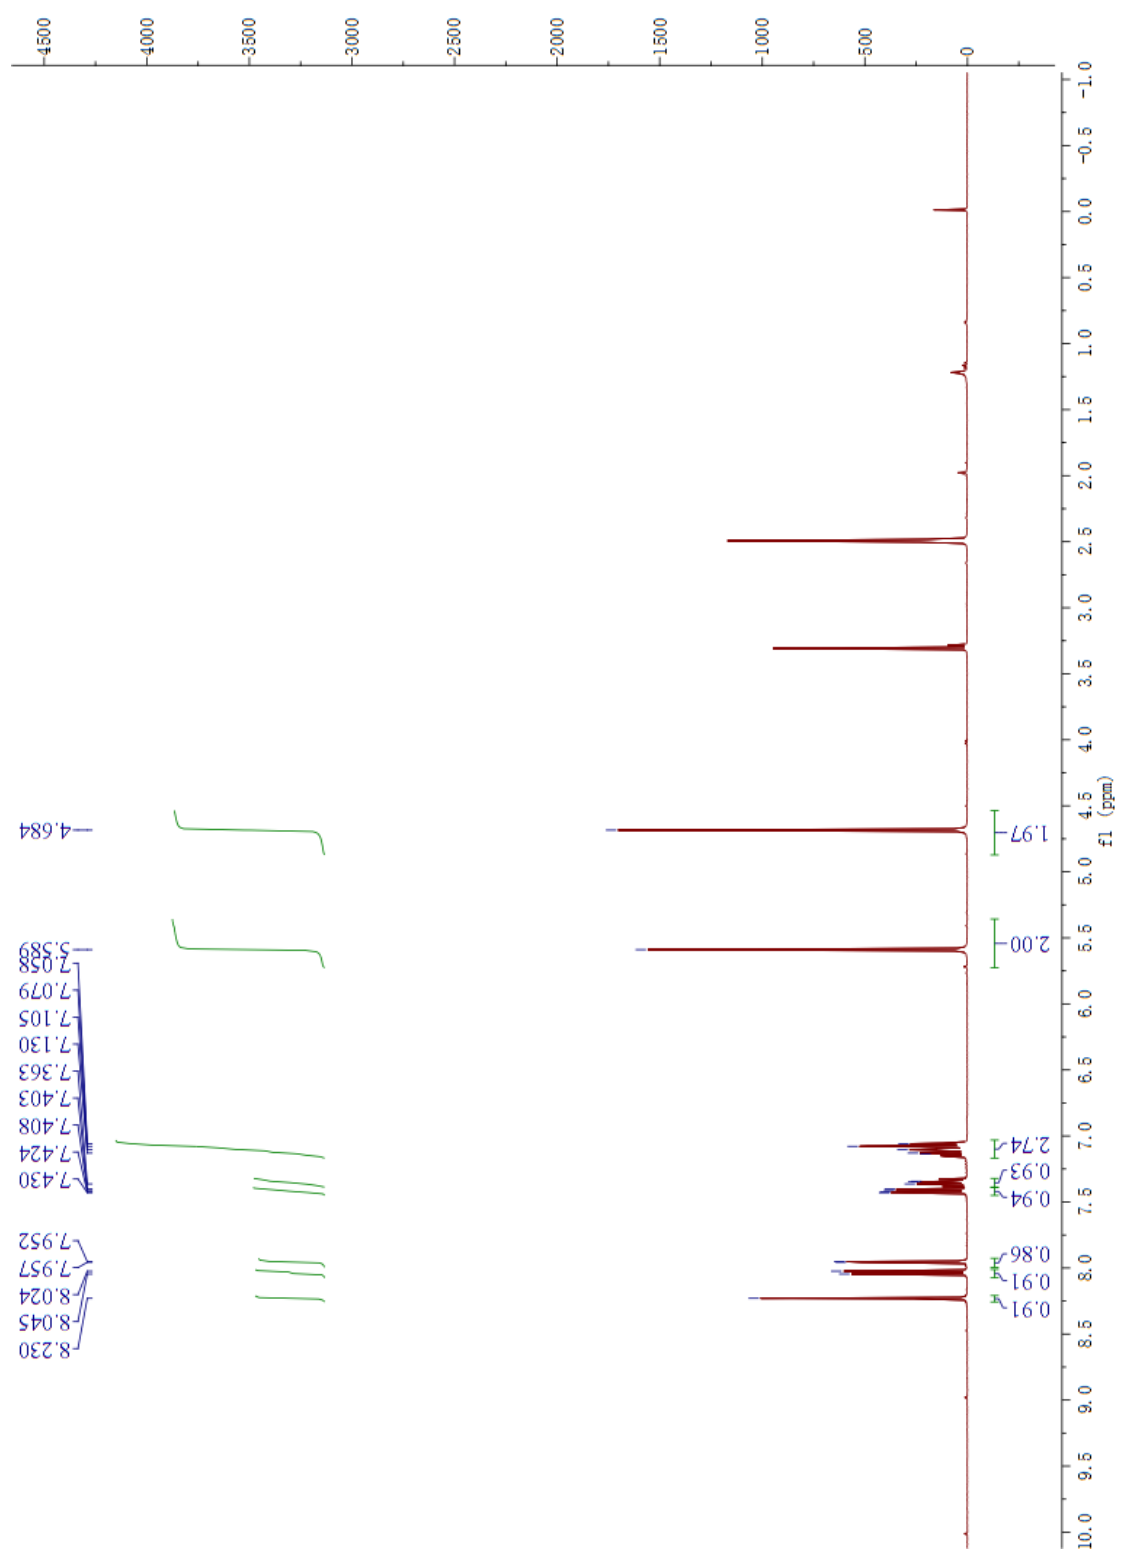

Figure S 31:  $^1\text{H}$  NMR of compound 6p



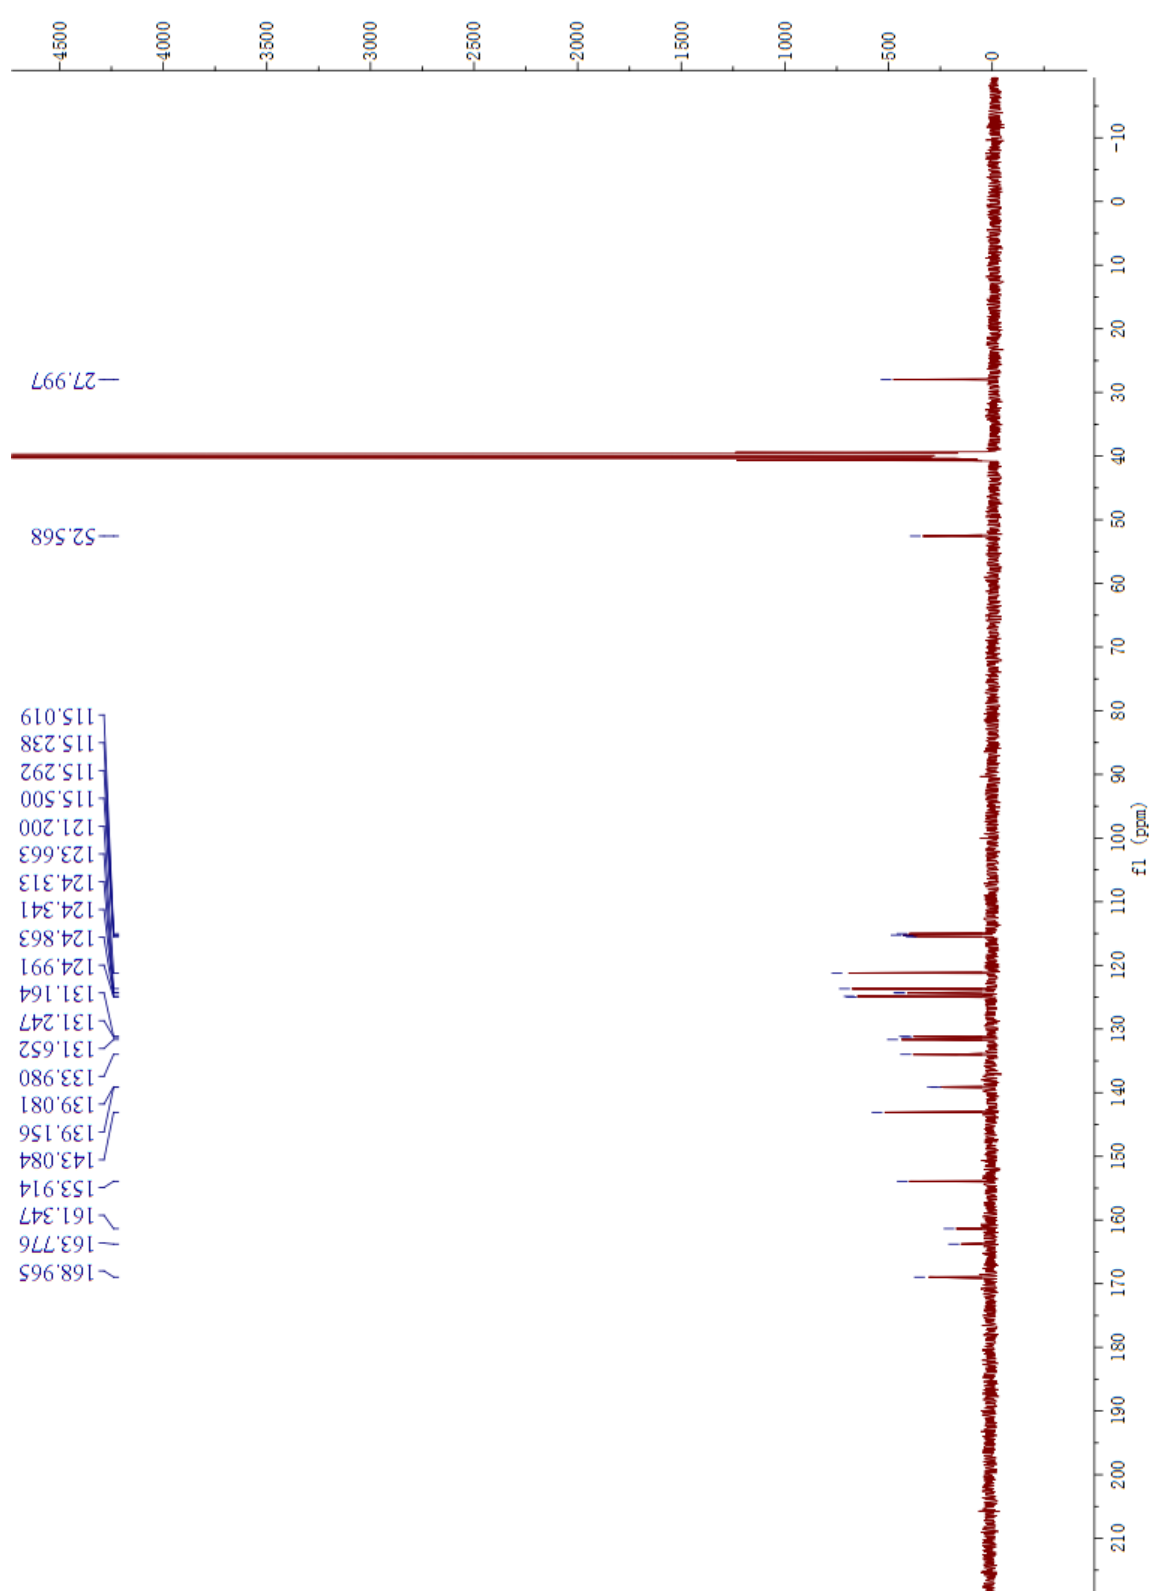

Figure S 32:  $^{13}\text{C}$  NMR of compound 6p

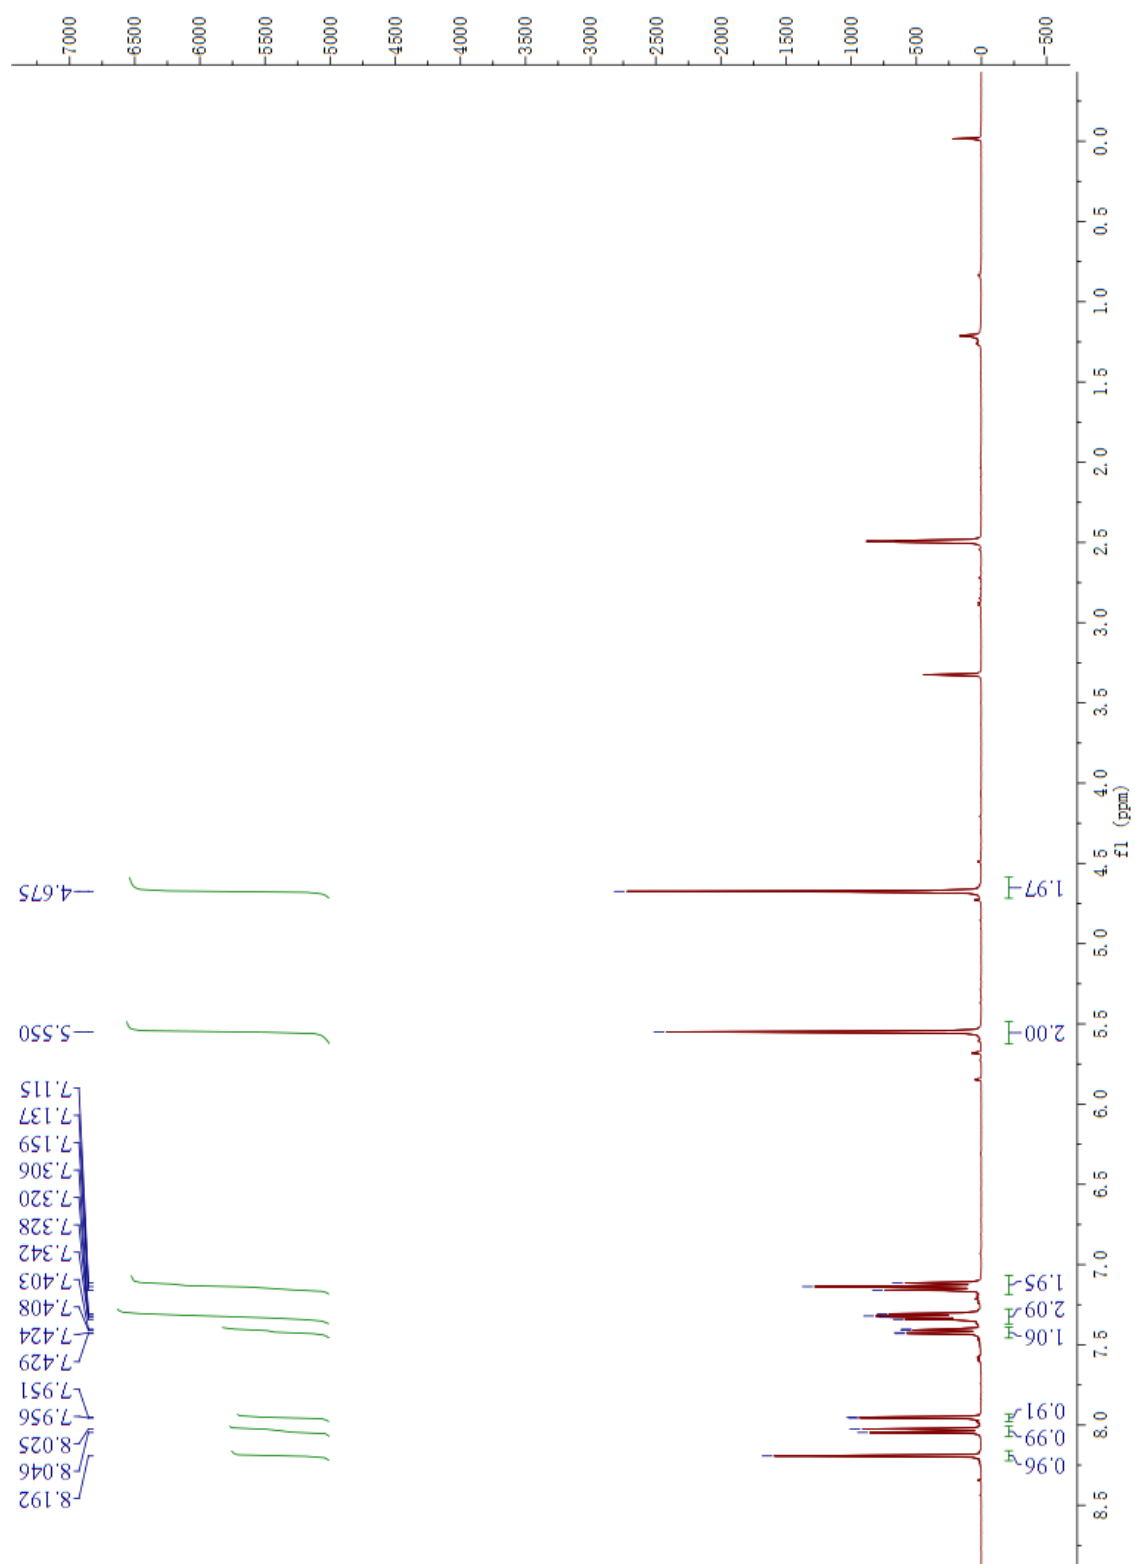

Figure S 33: <sup>1</sup>H NMR of compound 6q

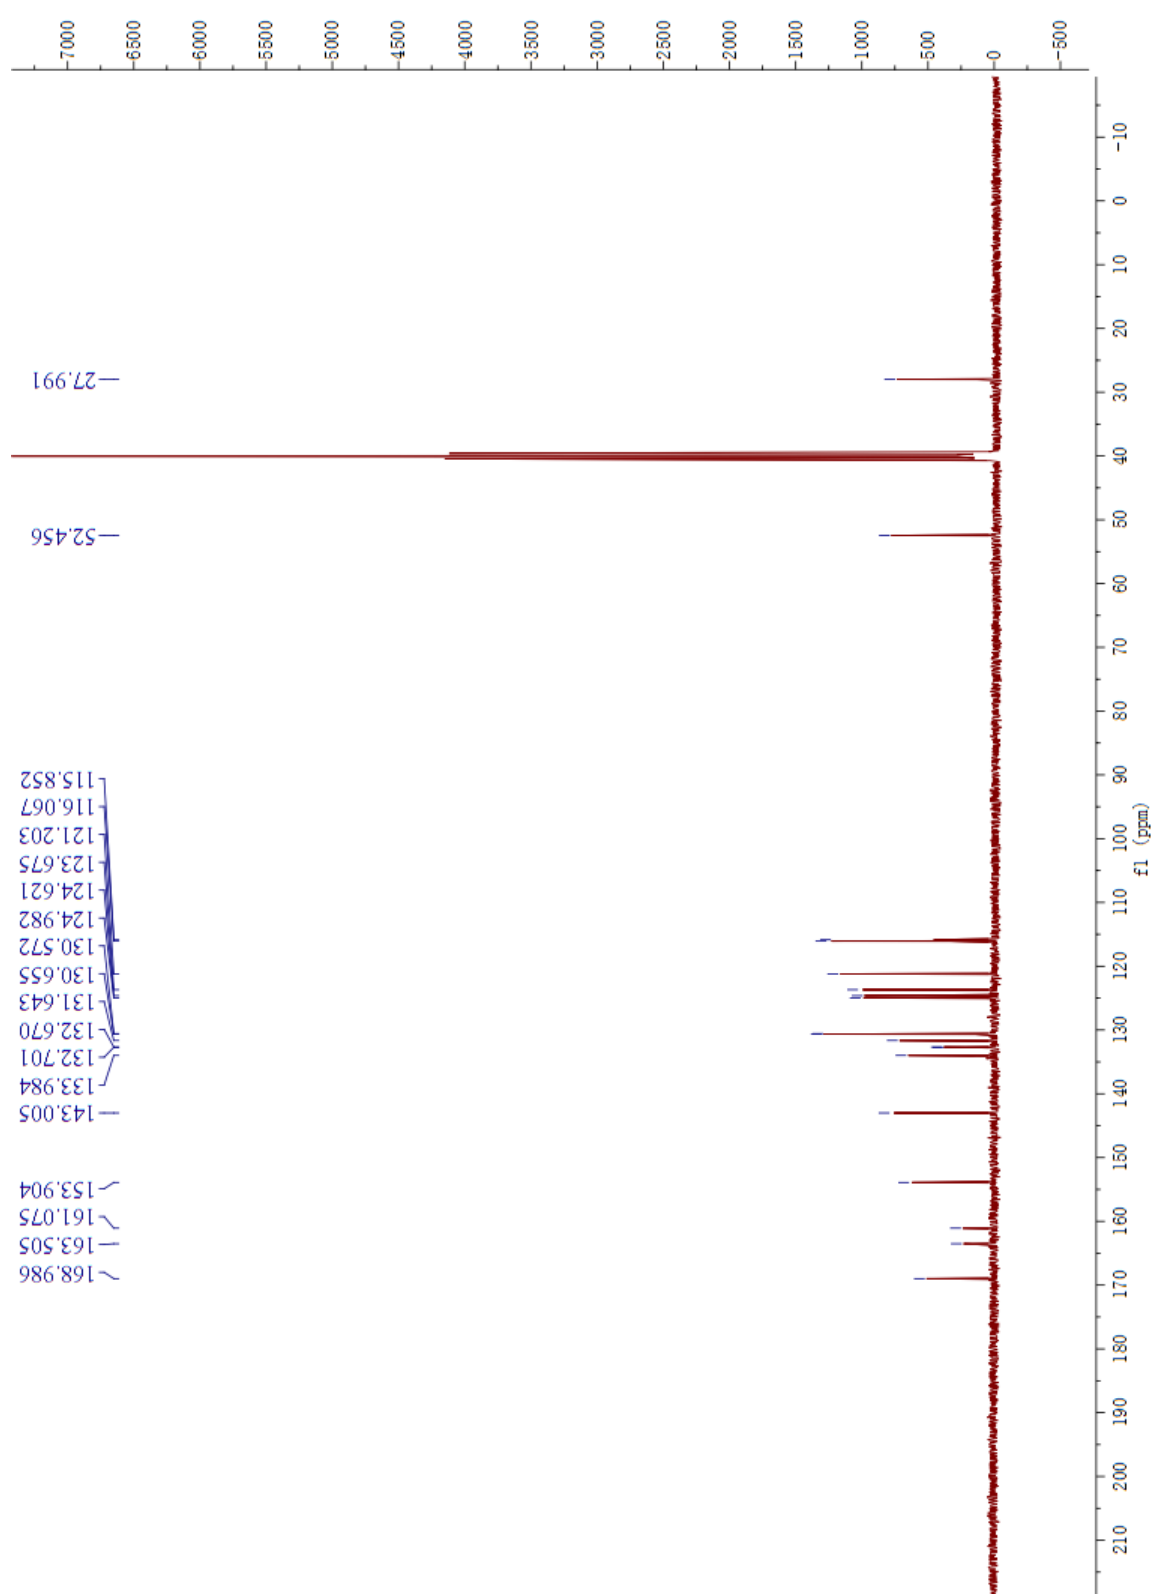

Figure S 34:  $^{13}\text{C}$  NMR of compound 6q

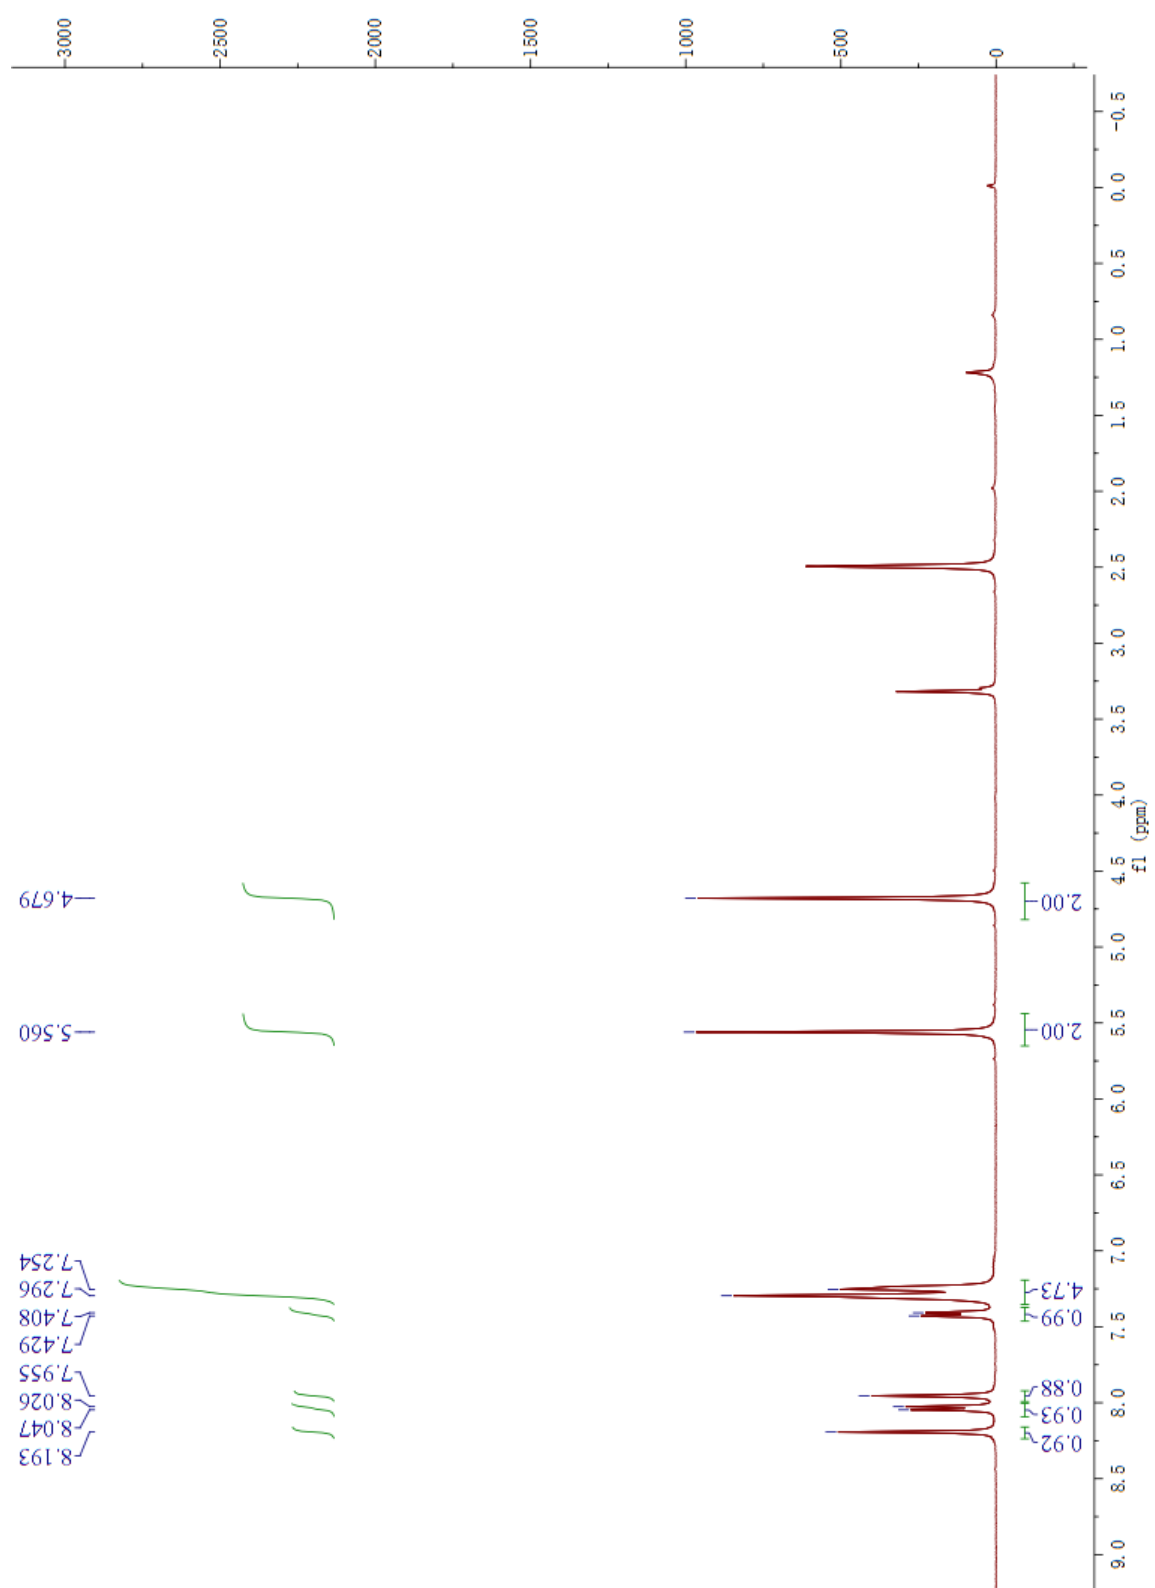

Figure S 35:  $^1\text{H}$  NMR of compound 6r

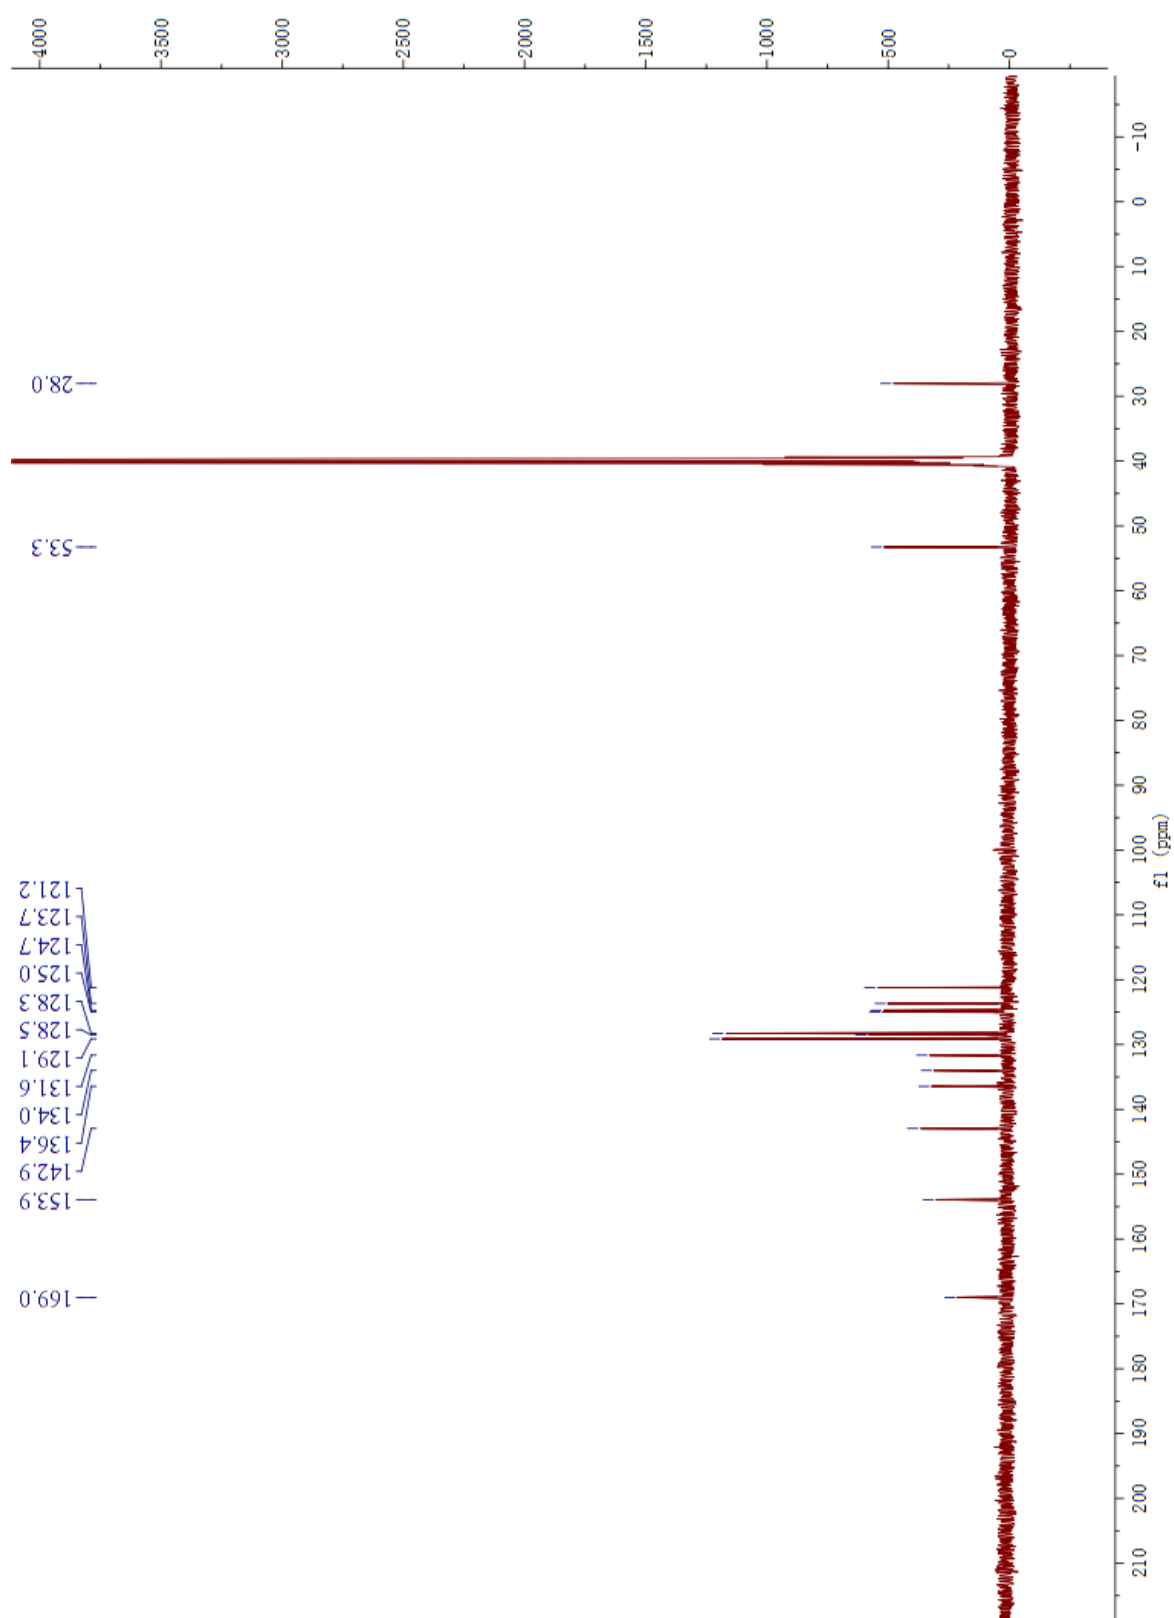

Figure S 36:  $^{13}\text{C}$  NMR of compound 6r

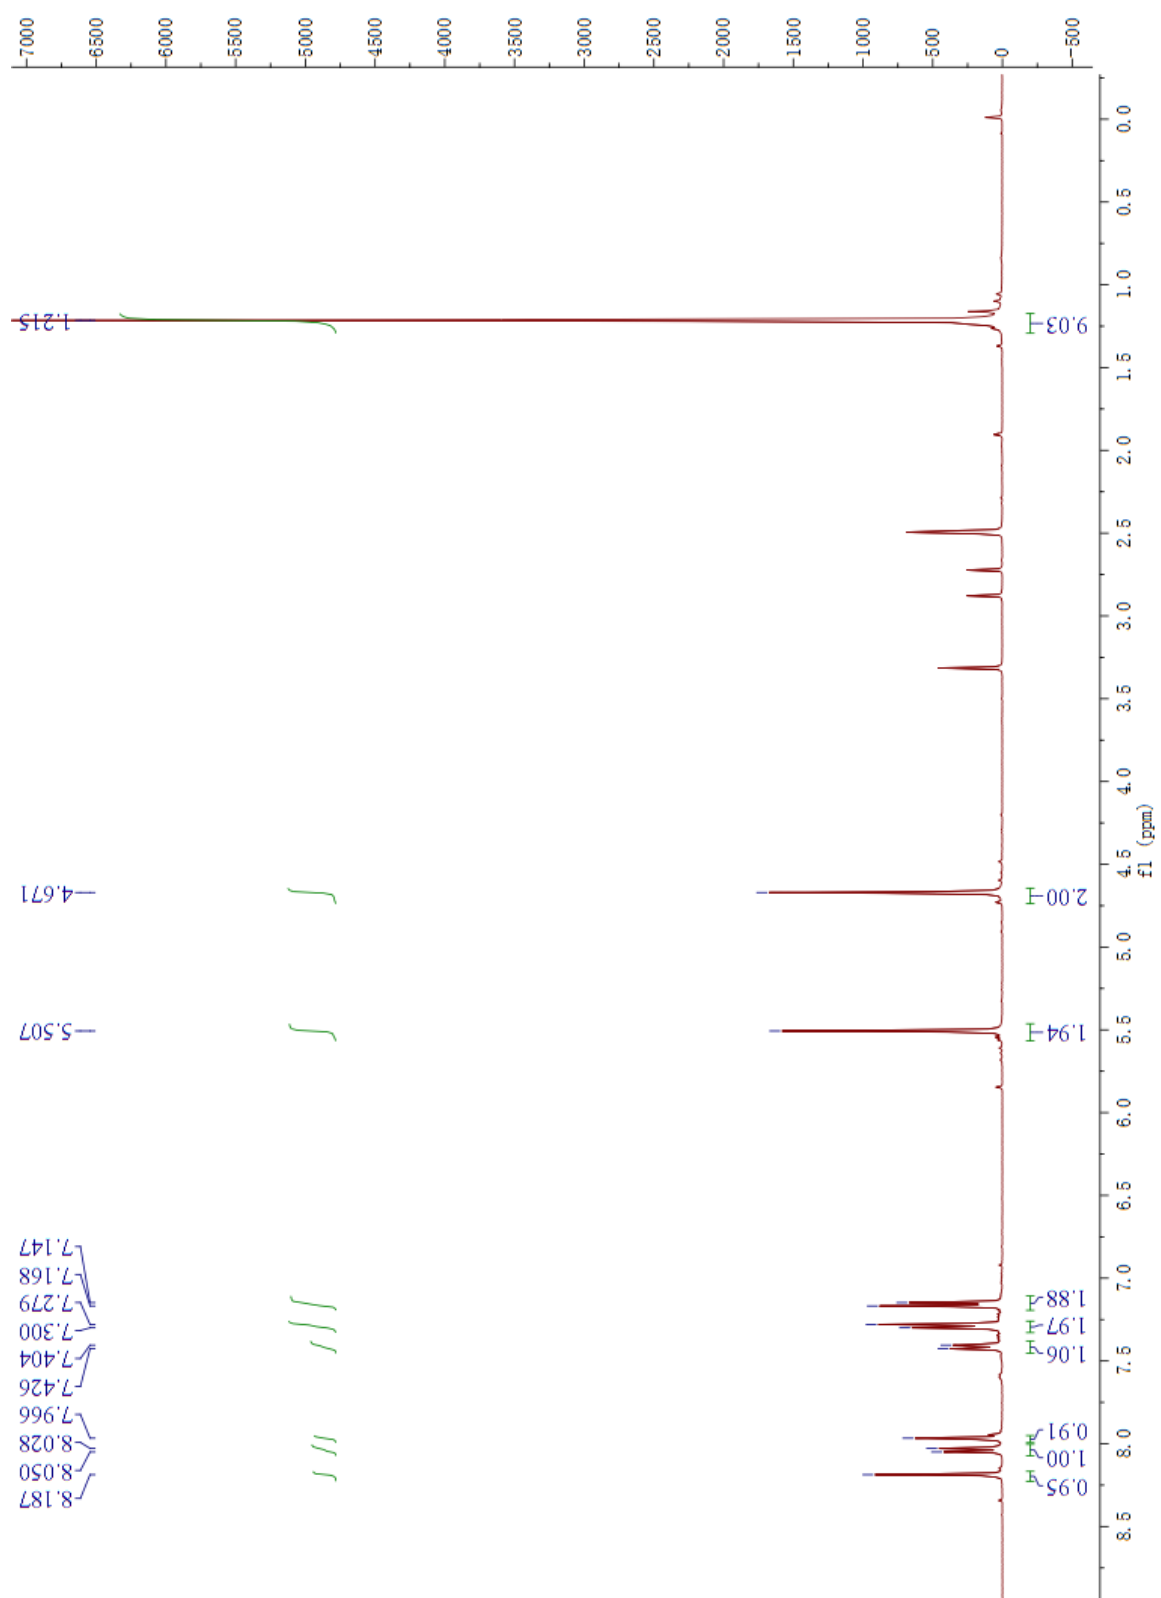

Figure S 37:  $^1\text{H}$  NMR of compound 6s

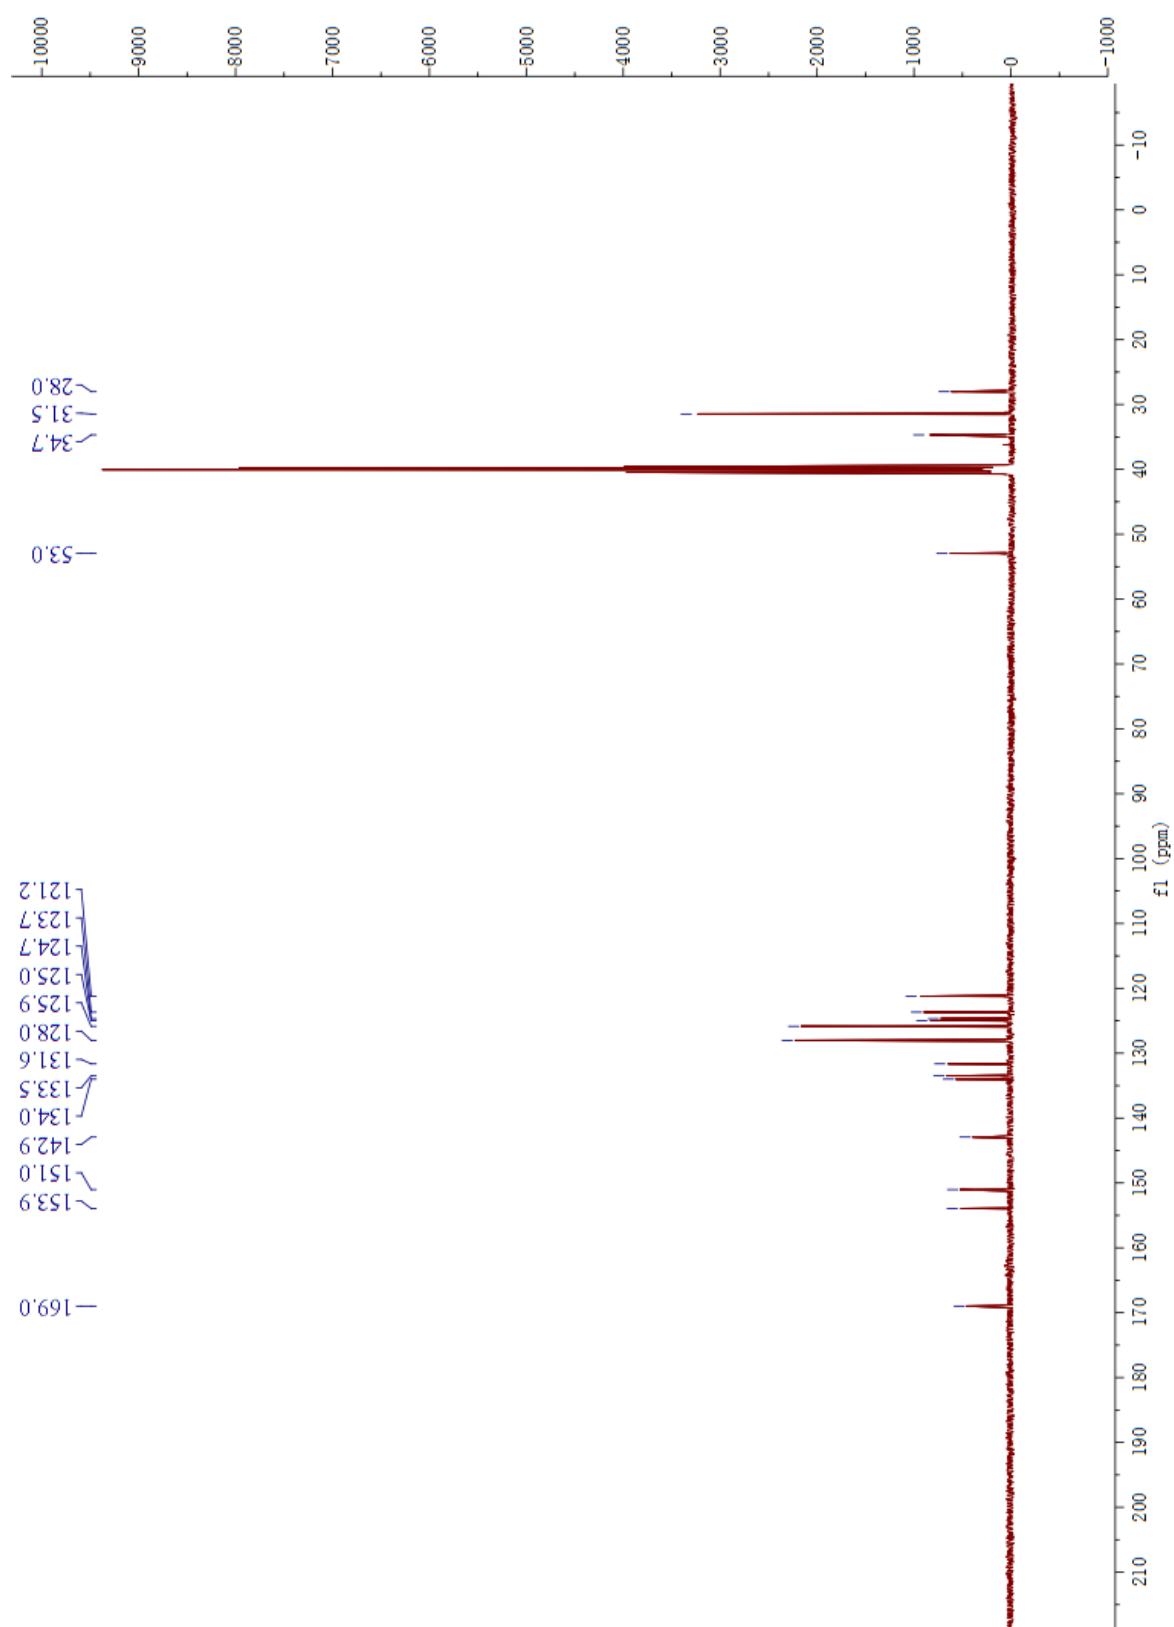

Figure S 38:  $^{13}\text{C}$  NMR of compound 6s
